# Supplementary material for: hnRNPA1 couples nuclear export and translation of specific mRNAs downstream of FGF-2/S6K2 signalling
Source: Oxford University Press journal article supplement (doi:10.1093/nar/gku953), 2014-10-16

## Supplemental Data

### Supplementary Materials and Methods

#### Reagents and antibodies

Human Recombinant (rec-) FGF-2 and all inhibitors were from CalBiochem; rec-S6K2, Protein-G and -A magnetic beads and Lipofectamine RNAiMAX from Invitrogen; rec-hnRNPA1 from Novus Biological; RNAeasy, Plasmid preparation kits, Attractene, TNPO1 and TNPO2 qPCR quantitect primers from Qiagen; radiolabelled  $^{32}\text{P}$ - $\gamma$  ATP and  $^{32}\text{P}$  orthophosphate from Perkin Elmer; Quickchange site-directed mutagenesis kit and RNase inhibitor from Promega. All other reagents were from Sigma Aldrich. Mouse monoclonal antibodies: FLAG (M2),  $\beta$ -actin,  $\alpha$ -tubulin, SUMO1 (GMP1), Nxf1, ALY were from Sigma Aldrich; Rabbit polyclonals for BclXL, PDCD4, SUMO1, pERK, UBC9 from Cell Signalling Technologies. Rabbit polyclonal antibody for 14-3-3 $\epsilon$ ,  $\theta$  and  $\sigma$  and mouse monoclonals for hnRNPA1 and S6K1 from Santa Cruz. All siRNAs were from Dharmacon.

#### RNA immunoprecipitation (RNA-IP) qPCR primers

Primers used for qPCR were as follow:

BCL-XL-F: TGCGTGGAAGCGTAGACAAGGA

BCL-XL-R: AAGGCTCTAGGTGGTCATTCAGGT;

XIAP-F: CCGTGCGGTGCTTTAGTTGT;

XIAP-R: TTCCTCGGGTATATGGTGTCTGAT;

cIAP1-F: GCCTGATGCTGGATAACTGG;

cIAP1-R: GGCGACAGAAAAGTCAATGG;

GAPDH-F: AATCCCATCACCATCTTCCA;

GAPDH-R: TGGACTCCACGACGTACTCA.

#### Synthetic RNA preparation T7 primers

T7 forward and reverse primers for BCL-XL and XIAP were: BCL-XL-F, TAATACGACTCACTATAGGGCGACAGTAGGAGGCGGAGAGC; BCL-XL-R, TTTTATAATAGAGATGGGCTC;

XIAP-F, TAATACGACTCACTATAGGGCGAAATTAGAATGTTTCTTAGCGGTC; XIAP-R,  
CTTCTCTTGAAAATAGGAC.

### **Immunohistochemistry**

Tissue microarray (TMA) samples from Lung Cancer patients (n=204) or Breast Cancer patients (n=194) were stained for S6K2, hnRNPA1 and BCL-XL as described earlier (1). A semi quantitative immunohistochemical score (IHS) was used as previously described (2), assessing both the percentage of positive cells and the intensity of staining. For the intensity, a score of 0 to 3, corresponding to negative, weak, moderate and strong positivity, was recorded. The range of possible scores was thus 0 to 300. Two observers blinded to all the clinical data scored all cases and results were 99% consistent. In the 1% of discrepant results a further review was performed by both observers to achieve agreement. Lung tissue samples were further subdivided into Groups 1-4 for increasing S6K2 staining intensity scores, with Group 1 corresponding to negative staining for S6K2 (n=80); Group 2 for intensity of 1-50 (n=60); Group 3 for intensity of 51-70 (n=30) and Group 4 for intensity higher than 70 (n=34). Breast tissue samples were also subdivided into Groups 1-4 for increasing S6K2 staining scores, with Group 1 for intensity 0-80 (n=45); Group 2 for intensity of 81-150 (n=44); Group 3 for intensity of 150-200 (n=38) and Group 4 for intensity of 201-300 (n=66). Average score for BCL-XL and cytoplasmic hnRNPA1 staining intensities for the corresponding groups were calculated and correlation coefficients obtained for S6K2 vs BclXL and S6K2 vs cyto-hnRNPA1 scores. p-values were calculated using ANOVA.

### **Supplemental References**

1. Lara R, Mauri FA, Taylor H, Derua R, Shia A, Gray C, Nicols A, Shiner RJ, Schofield E, Bates PA, Waelkens E, Dallman M, Lamb J, Zicha D, Downward J, Seckl MJ, Pardo OE (2011) An siRNA screen identifies RSK1 as a key modulator of lung cancer metastasis. *Oncogene*

2. Herberger B, Puhalla H, Lehnert M, Wrba F, Novak S, Brandstetter A, Gruenberger B, Gruenberger T, Pirker R, Filipits M (2007) Activated mammalian target of rapamycin is an adverse prognostic factor in patients with biliary tract adenocarcinoma. *Clin Cancer Res* **13**: 4795-4799

## Supplementary Table and Figure Legends

### Supplementary Tables

**Table S1:** Quantitative phosphoproteomics analysis of H510 SCLC cells treated with or without FGF-

2. Trypsin digests of protein extracts from H510 cells treated with or without FGF-2 were differentially dimethyl-labelled using heavy and light versions of formaldehyde, respectively. Equal amounts of peptides from both conditions were mixed, the phospho-enriched fraction analysed by LC-MS/MS and the light to heavy ratio (L/H) calculated. The experiment was performed three times so as to obtain standard errors (Std. Err.) on the ratio. The gene identifier (ID), sequence of the detected peptide and nature of the modification are indicated. The grayed boxes indicate peptides specifically modified downstream of FGF-2, rather than SCF (Suppl. Fig 3), signalling. (n); position of the modified aa, p; phosphorylation, o; oxidation.

**Table S2:** List of proteins co-purified in the S6K2-TAP. Tandem affinity purification was performed in HEK293 cells, treated with or without FGF-2, using S6K2 as bait. Tryptic digests were analysed by LC-MS/MS and peptide count for the identified proteins (ID) performed. The difference (Diff) between the peptide count in the absence and the presence of FGF-2 is indicated (<0; decrease, >0; increase, 0; no change following treatment with FGF-2).

**Table S3:** Quantitative phosphoproteomics analysis of H510 SCLC cells treated with or without SCF. Trypsin digests of protein extracts from H510 cells treated with or without SCF were dimethyl-labelled using heavy and light versions of formaldehyde, respectively. Equal amounts of peptides

from both conditions were mixed, the phospho-enriched fraction analysed by LC-MS/MS and the light to heavy ratio (L/H) calculated. The experiment was performed three times so as to obtain standard errors (Std. Err.) on the ratio. The gene identifier (ID), sequence of the detected peptide and the nature of the modification are indicated. The grayed boxes indicate peptides specifically modified downstream of SCF, rather than FGF-2 (Suppl. Fig 1), signaling. (n); position of the modified aa, p; phosphorylation, o; oxidation.

**Table S4:** List of proteins co-purified in the hnRNPA1-TAP. Tandem affinity purification was performed in HEK293 cells, treated with or without FGF-2, using hnRNPA1 as bait. Tryptic digests were analysed by LC-MS/MS and peptide count for the identified proteins (ID) performed. The difference (Diff) between the peptide count in the absence and the presence of FGF-2 is indicated (<0; decrease, >0; increase, 0; no change following treatment with FGF-2).

#### Supplementary Figures

**Figure S1:** Overlap between phosphoproteomics and TAP-Tag hits. (A) Venn diagram showing the overlap in proteins identified between the phosphoproteomic analysis  $\pm$  FGF-2 (Suppl. Fig 1) and the S6K2 TAP-Tag (see Suppl. Fig 2). The IDs of the 9 overlapping identified proteins are listed. (B) Venn diagram showing the overlap in proteins identified by TAP to interact with S6K2 and hnRNPA1 (Suppl. Fig 2 and 4). The IDs of the 74 overlapping identified proteins are listed. (C) Gene Ontology (GO) analysis for these 74 proteins listed in (B) shows an enrichment in GO terms associated with translation-related and RNA processing activities.

**Figure S2:** Cytoplasmic depletion of hnRNPA1 is independent of protein degradation. (A) HEK293 cells were treated with FGF2 for indicated time and subjected to subcellular fractionation. Nuclear and cytoplasmic fractions were separated on SDS-PAGE and probed for the indicated proteins. Detection of Lamin and Tubulin were used to assess the purity of both fractions. HEK293 cells were treated for 1 h with 10 $\mu$ M MG132 (B) or 3  $\mu$ M Chloroquine (C), concentrations previously shown to inhibit proteosomal degradation and autophagy in our cell system, respectively. The cells were then

stimulated with FGF2 for the indicated time. The cytoplasmic fraction was analysed by SDS-PAGE/Western blotting for the indicated proteins.

**Figure S3:** FGF2-mediated phosphorylation of hnRNPA1 regulates its interaction with 14-3-3 $\sigma$  and 14-3-3 $\theta$  leading to hnRNPA1 K183 sumoylation and cytoplasmic depletion. (A) HEK293 cells expressing FLAG-tagged wild type (WT) or phospho-mutant (S4AS6A) hnRNPA1 were stimulated with FGF2 and subjected to immunoprecipitation with 14-3-3 antibodies. Immunoprecipitates were analysed by SDS-PAGE/Western blotting for the indicated proteins. (B) HEK293 cells expressing FLAG-tagged WT or sumoylation mutant (K3R, K8R or K183R) hnRNPA1 were stimulated with FGF2 for the indicated time and the cytoplasmic fraction analysed by SDS-PAGE/Western blotting for the indicated proteins. (C) Multiple sequence alignment for hnRNPA1 sequences from various species. The position of the conserved K183 residue is indicated with an asterisk.

**Figure S4:** FGF2-dependent modulation of hnRNPA1 in H510 cells. (A) H510 cells were treated  $\pm$  FGF2 and the cytoplasmic fraction analysed by SDS-PAGE/Western blotting (WB) for the indicated proteins. (B and C) H510 cells were stimulated  $\pm$  FGF2 and the whole cell lysate (B) or the cytoplasmic fraction (C) subjected to immunoprecipitation with hnRNPA1 or 14-3-3 antibodies, respectively. Immunoprecipitates and whole cell lysates were analysed by SDS-PAGE/WB for the indicated proteins. (D) H510 cells were stimulated  $\pm$  FGF2 for 30 min and the cytoplasmic fraction subjected to RNA-immunoprecipitation with an hnRNPA1 antibody. hnRNPA1-bound mRNAs were analysed by qPCR.

**Figure S5:** Schematic of the hnRNPA1 peptide array. 14 amino acid-long overlapping peptides covering the entire sequence of the hnRNPA1 protein were synthesised and covalently coupled to nitrocellulose membranes in 5 rows each containing 30 peptides (Top panel). In the last row, an S6 peptide was spotted in separate 4 positions. The sequence for each peptide and its relative position and molecular weight are indicated in the bottom panel.

**Figure S6:** Immunohistochemical staining for S6K2, hnRNPA1 and BCL-XL of tissue micro-array samples from lung (A) and breast cancer (B) patients. Sample images for S6K2, BCL-XL and hnRNPA1 staining for a representative patient from each S6K2 score group (upper panel) and the corresponding staining scores (lower panel). Staining for our proteins of interest was revealed using an HRP-conjugated secondary antibody (brown colour). Blue colour; haematoxylin staining. Magnification; x200.

**Figure S7:** Controls for RNA-IP. (A, C and E): Indicated cells stimulated with or without FGF2 were subjected to immunoprecipitation with hnRNPA1 or FLAG antibodies prior to isolation of the bound BclXL and XIAP mRNA. Half of the immunoprecipitates were used for RNA-IP (presented in Figure 5A-5C) and the rest subjected to SDS-PAGE/ Western blotting for the indicated proteins. (B, D and F): Levels of BCLXL and XIAP input mRNA normalized to unstimulated control for the RNA-IP depicted in Figs 5A-C.

Table S1

| IDs      | z | Sequence                                 | L/H     | Std.Err.                   | Modifications |
|----------|---|------------------------------------------|---------|----------------------------|---------------|
| ABCF1    | 3 | LSVPTSDEEEVPAKP                          | 0.4625  | 0.1436 (5) p (ST)          |               |
| ALDOA    | 3 | GILAAESTGSIKR                            | 0.1519  | 0.4551 (11) p (ST)         |               |
| ALG3     | 2 | SGSAAQAEGLCK                             | 0.7455  | 0.1439 (1) p (ST)          |               |
| ALG3     | 2 | SGSAAQAEGLCK                             | 0.7455  | 0.1439 (3) p (ST)          |               |
| APOOL    | 2 | LGSSSEIEVPAK                             | 1.019   | 0.05508 (3) p (ST)         |               |
| BCLAF1   | 2 | IDISPSTLR                                | 0.8161  | 0.02426 (4) p (ST)         |               |
| BCLAF1   | 2 | RIDISPSTLR                               | 0.7131  | 0.1141 (5) p (ST)          |               |
| BCLAF1   | 3 | DLFDYSPPLHK                              | 0.7851  | 0.03953 (6) p (ST)         |               |
| BCLAF1   | 3 | AEGEPQEEESPLKSK                          | 1.1     | 0.07141 (9) p (ST)         |               |
| BCLAF1   | 3 | LKDLFDYSPPLHK                            | 0.8223  | 0.02818 (8) p (ST)         |               |
| BCLAF1   | 4 | LKDLFDYSPPLHK                            | 0.7988  | 0.03209 (8) p (ST)         |               |
| BCLAF1   | 3 | KAEGEPQEEESPLKSK                         | 0.9994  | 0.05002 (10) p (ST)        |               |
| CANX     | 4 | QKSDAEEDGGTVSQEEEDRKPK                   | 1.2     | 0.03619 (3) p (ST)         |               |
| CANX     | 5 | QKSDAEEDGGTVSQEEEDRKPK                   | 1.011   | 0.07812 (3) p (ST)         |               |
| CANX     | 4 | QKSDAEEDGGTVSQEEEDRKPK                   | 1.2     | 0.03619 (1) p (ST)         |               |
| CANX     | 5 | QKSDAEEDGGTVSQEEEDRKPK                   | 1.083   | 0.04862 (13) p (ST)        |               |
| CANX     | 4 | QKSDAEEDGGTVSQEEEDRKPK                   | 1.066   | 0.03205 (3/11) p (ST)      |               |
| CANX     | 2 | TVIEQSWGSPK                              | 1.119   | 0.05165 (10) p (ST)        |               |
| HSPD1    | 3 | GVMLAVDAVIAELKK                          | 0.6389  | 0.2678 (3) o (M)           |               |
| HSPD1    | 3 | ALMLQGVDLLADAVAVTMGPK                    | 0.8979  | 0.03396 (18) o (M)         |               |
| HSPD1    | 3 | ALMLQGVDLLADAVAVTMGPK                    | 0.5012  | 0.3136 (3/18) o (M)        |               |
| CLDN11   | 3 | FYYTAGSSSPTHAK                           | 1.033   | 0.05342 (9) p (ST)         |               |
| CSTF3    | 4 | RPNEDSDEEEKGAVVPPVHDIYR                  | 0.2414  | 0.1873 (6) p (ST)          |               |
| CTNND1   | 3 | GSLASLDSLRK                              | 0.7902  | 0.1392 (8) p (ST)          |               |
| DKC1     | 3 | AGLESAGPEGGSDSTTKK                       | 0.9111  | 0.226 (14) p (ST)          |               |
| DLGAP4   | 3 | ANSWQLVETPEKR                            | 0.8508  | 0.1097 (9) p (ST)          |               |
| DNAJC5   | 3 | SLSTSGESLYHVLGLDK                        | 1.335   | 0.02063 (3) p (ST)         |               |
| DNAJC5   | 4 | SLSTSGESLYHVLGLDKNATSDDIKK               | 1.357   | 0.01787 (3) p (ST)         |               |
| EEF1D    | 3 | ATAPQTQHVSPMR                            | 0.5439  | 0.02671 (10) p (ST)        |               |
| ELAVL1   | 3 | NVALLSQLYHSPARR                          | 0.6549  | 0.1455 (11) p (ST)         |               |
| FAM134A  | 2 | QALDSEEEEEVAAK                           | 0.6561  | 0.1166 (5) p (ST)          |               |
| FAM54B   | 2 | NASVPNLR                                 | 0.5272  | 0.0653 (3) p (ST)          |               |
| FAM54B   | 2 | ASSFADMMGILK                             | 0.572   | 999 (3) p (ST)             |               |
| FARP1    | 2 | LGAPENSIGSTLER                           | 0.5955  | 0.04611 (11) p (ST)        |               |
| G3BP1    | 3 | SSSPAPADIAQTVOEDLR                       | 0.4949  | 0.03259 (1) p (ST)         |               |
| GFPT1    | 2 | VDSTTCLFPVEEK                            | 0.5651  | 0.0314 (3) p (ST)          |               |
| GSK3A    | 2 | GEPNVSYICSR                              | 0.4842  | 0.04359 (7) p (Y)          |               |
| HIST1H3E | 4 | FQSSAVMALQEACEAYLVGLFEDTNLCIAHAK         | 0.7377  | 0.02861 (7) o (M)          |               |
| HIST2H3C | 4 | FQSSAVMALQEACEAYLVGLFEDTNLCIAHAK         | 0.7973  | 0.04751 (7) o (M)          |               |
| HIST2H3C | 5 | FQSSAVMALQEACEAYLVGLFEDTNLCIAHAK         | 0.7564  | 0.08265 (7/16) o (M)/p (Y) |               |
| HIST1H4A | 2 | RISGLIYEETR                              | 0.7364  | 0.09754 (3) p (ST)         |               |
| HDGF     | 3 | AGDLDLDSPKRPK                            | 0.5801  | 0.06798 (8) p (ST)         |               |
| HDGF     | 4 | RAGDLDLDSPKRPK                           | 0.5483  | 0.03258 (9) p (ST)         |               |
| HMG1     | 3 | KLKEKEEIGISQESSEEEQ                      | 0.9305  | 0.0564 (1) p (ST)          |               |
| HMG1     | 4 | KQPPVSPGTALVGSQKEPSEVPTPK                | 0.7742  | 0.02671 (14) p (ST)        |               |
| HNRNPH1  | 3 | HTGPNSPDTANDGFVR                         | 0.5924  | 0.135 (6) p (ST)           |               |
| HNRNPUL2 | 2 | SGDETGPSSEVPDGK                          | 1.15    | 0.07674 (1) p (ST)         |               |
| HNRNPA1  | 4 | SESPKEPEQLR                              | 1.071   | 0.02814 (4) p (ST)         |               |
| HNRNPA1  | 4 | SESPKEPEQLR                              | 0.4271  | 0.0245 (4/6) p (ST)        |               |
| HNRNPA3  | 2 | SSGSPYGGGYSGGGSGGYGSR                    | 0.8771  | 0.01947 (4) p (ST)         |               |
| HNRNPD   | 3 | FGEVVDCTLKLDPITGR                        | 0.8577  | 0.03011 (8) p (ST)         |               |
| HNRNPK   | 4 | IPTLEEGQLQPSPTATSQLPESDAVECLNYQHYK       | 0.6288  | 0.03428 (15) p (ST)        |               |
| HNRNPK   | 4 | IPTLEEGQLQPSPTATSQLPESDAVECLNYQHYK       | 0.6288  | 0.03428 (13) p (ST)        |               |
| HNRNPU   | 4 | AKSPQPPVEEEDHFDVTVCLDTYNCDLHFK           | 0.9357  | 0.02836 (3) p (ST)         |               |
| HSP90AB1 | 3 | EDVGSDEEDDSGKDK                          | 0.4445  | 0.07292 (6) p (ST)         |               |
| HSP90AB1 | 3 | EDVGSDEEDDSGKDKK                         | 0.5584  | 0.1461 (6) p (ST)          |               |
| HUWE1    | 2 | ESGTASDDFENLR                            | 0.08135 | 1.567 (6) p (ST)           |               |
| IRF2B2   | 3 | RKPSPEPEGEVGP                            | 0.5616  | 0.1568 (4) p (ST)          |               |
| EIF2B1   | 2 | QGSFVAAGAPAK                             | 0.6052  | 0.116 (3) p (ST)           |               |
| EIF5B    | 3 | NKPGPNIESGNEDDASFK                       | 0.4128  | 0.07754 (9) p (ST)         |               |
| ITPR3    | 2 | VASFSPGSSSR                              | 1.165   | 0.2199 (3) p (ST)          |               |
| PRKAR1A  | 3 | TDSREDEISPPPNPVVK                        | 0.4926  | 0.01924 (9) p (ST)         |               |
| PRKACA   | 3 | TWTLCGTPEYLAPEILSK                       | 0.8217  | 0.08344 (3) p (ST)         |               |
| PRKACA   | 3 | GRTWTLCGTPEYLAPEILSK                     | 0.4866  | 0.6972 (5) p (ST)          |               |
| KHDRBS1  | 3 | SGSMDPSGAHPSVR                           | 0.5612  | 0.09778 (3) p (ST)         |               |
| KLC2     | 2 | ASSLNFLNK                                | 0.4724  | 0.06266 (3) p (ST)         |               |
| KRI1     | 3 | AFVEDSEDEGAGEGGSSLLQK                    | 0.8696  | 0.06729 (6) p (ST)         |               |
| SSB      | 4 | FASDDEHDEHDENGATGPVKR                    | 0.5605  | 0.05901 (3) p (ST)         |               |
| TMPO     | 2 | SSTPLPTISSAENTR                          | 1.35    | 0.02838 (3) p (ST)         |               |
| TMPO     | 4 | GPPDFSSDEEREPTVVLGSGAAAGR                | 1.056   | 0.02981 (7) p (ST)         |               |
| TMPO     | 2 | SSTPLPTISSAENTR                          | 1.35    | 0.02838 (3) p (ST)         |               |
| TMPO     | 4 | GPPDFSSDEEREPTVVLGSGAAAGR                | 1.056   | 0.02981 (7) p (ST)         |               |
| LMNB2    | 3 | LKLSPPSSSR                               | 1.09    | 0.3453 (4) p (ST)          |               |
| MAP1B    | 2 | SDISPLTPR                                | 0.338   | 0.3653 (7) p (ST)          |               |
| MAP1B    | 2 | GAESPFEK                                 | 4.78    | 4.808 (4) p (ST)           |               |
| MAP1B    | 2 | SPLSPSPSPLEK                             | 0.5654  | 0.1312 (10) p (ST)         |               |
| MAP1B    | 3 | EVPSKEEPSVYKAEVAEK                       | 1.425   | 0.04416 (9) p (ST)         |               |
| MAP1B    | 3 | TATCHSSSPPIDAASAEPYGFR                   | 0.5801  | 0.01544 (9) p (ST)         |               |
| MAP1B    | 3 | TATCHSSSPPIDAASAEPYGFR                   | 0.5801  | 0.01544 (7) p (ST)         |               |
| MAP1B    | 4 | KLGDVSPQTIDVQFGSKFEDTK                   | 0.6369  | 0.06581 (8) p (ST)         |               |
| MAP1B    | 4 | VLSPLRSPPLIGSESAYESFLSADDKASGR           | 0.4015  | 0.08954 (7) p (ST)         |               |
| MAP1B    | 4 | TELSPSFINPNLEWFASEEPTESEKPLTQSGGAPPPPGGK | 0.5911  | 0.03628 (6) p (ST)         |               |
| MATR3    | 3 | SYSPDGKESPSDKK                           | 1.089   | 0.03185 (3) p (ST)         |               |
| MATR3    | 4 | RDSFDDRGPSLNPVLDYDHGSR                   | 0.6921  | 0.01329 (3) p (ST)         |               |
| BTA1F1   | 4 | KEskeETSIDVAGKPNEVT                      | 1.218   | 0.07594 (3) p (ST)         |               |
| NDRG1    | 2 | TASGSSVTSLDGTR                           | 0.4198  | 0.02482 (3) p (ST)         |               |
| NIPBL    | 2 | ATISLLGGGSPK                             | 0.8254  | 0.05915 (10) p (ST)        |               |
| NOLC1    | 3 | AESSNSSSSSDSSEEEKAAATPK                  | 0.6278  | 0.06473 (4) p (ST)         |               |
| NOLC1    | 3 | AASSSSSSSSSDSSEEEKAAATPK                 | 0.9343  | 0.06137 (6) p (ST)         |               |
| NOLC1    | 4 | KASSSDSDSSEEEVQGP                        | 1.079   | 0.04882 (5) p (ST)         |               |
| NOLC1    | 3 | AASSSSSSSSSDSSEEEKAAATPK                 | 0.9343  | 0.06137 (4) p (ST)         |               |
| NOLC1    | 4 | AASSSDSDSSEEEVQGP                        | 0.07866 | 0.1973 (3/4/6) p (ST)      |               |
| NOLC1    | 4 | KASSSDSDSSEEEVQGP                        | 0.2931  | 0.1632 (3/4/5) p (ST)      |               |
| NOLC1    | 3 | AAESSSDSDSDSSEDEAPSKPAGTTK               | 0.9249  | 0.1385 (11) p (ST)         |               |
| NOLC1    | 4 | AAESSSDSDSDSSEDEAPSKPAGTTK               | 0.9953  | 999 (11) p (ST)            |               |
| NOLC1    | 4 | ASESSSSSESSDDDEEDQKKQPVQK                | 0.988   | 0.02918 (10) p (ST)        |               |
| NOLC1    | 4 | QQPVESSESDSDSSEEEKKPPTK                  | 1.326   | 0.04023 (18) p (ST)        |               |
| NOLC1    | 4 | QQPVESSESDSDSSEEEKKPPTK                  | 1.326   | 0.04023 (17) p (ST)        |               |
| NPM1     | 4 | CGSGPVHISGHLVAVEEDAEEDEEEEDVK            | 0.9123  | 0.05169 (22) p (ST)        |               |
| NUMA1    | 3 | KNSLSSLEEEVSLNR                          | 0.9792  | 0.3131 (6) p (ST)          |               |
| NUP35    | 2 | TLGTPTQPGSTPR                            | 0.8788  | 0.0806 (4) p (ST)          |               |
| NUP35    | 3 | CALSSPSLAFTPIIK                          | 0.9135  | 0.1916 (5) p (ST)          |               |
| NUP35    | 3 | ASTSDYQVISDRQTPK                         | 1.093   | 0.0591 (10) p (ST)         |               |
| PDHA1    | 3 | YHGHMSDPGVSYR                            | 13.18   | 0.9528 (5) p (ST)          |               |
| P4K2A    | 2 | SSSESYTQSFQSR                            | 0.8066  | 0.05918 (3) p (ST)         |               |
| PDCD4    | 2 | SGLTVTPSPK                               | 0.4667  | 0.05456 (8) p (ST)         |               |
| P4HB     | 4 | FLESGGQDGAAGDDDDLEDLEAAEEDPMEEDDDQK      | 0.563   | 0.06642 (27) o (M)         |               |
| PELP1    | 3 | GSPDGSLOTGKPSAPK                         | 1.065   | 0.07926 (2) p (ST)         |               |
| PELP1    | 3 | AGSNEDPILASGTPPTTIPPDFTFGGR              | 0.8934  | 0.03656 (14) p (ST)        |               |
| PGK1     | 3 | ALESPEPFLAILGGA                          | 0.521   | 0.05108 (6) p (ST)         |               |
| PGM2L1   | 3 | AVAGVMITASHNR                            | 0.4828  | 0.3025 (10) p (ST)         |               |
| PGRMC1   | 3 | GQDQPAASGSDSDDEPPPLPR                    | 1.011   | 0.06943 (10) p (ST)        |               |
| PGRMC1   | 3 | EGEETTVYSDEEEPDESAR                      | 1.135   | 0.01816 (9) p (ST)         |               |
| PGRMC1   | 3 | IVRGDQPAASGSDSDDEPPPLPR                  | 0.8744  | 0.0497 (13) p (ST)         |               |
| PGRMC1   | 4 | IVRGDQPAASGSDSDDEPPPLPR                  | 0.7179  | 0.03222 (13) p (ST)        |               |
| PGRMC1   | 4 | EGEETTVYSDEEEPDESARK                     | 0.9342  | 0.04012 (9) p (ST)         |               |
| PGRMC2   | 3 | LLKPGEEPSEYDEEDTK                        | 5.28    | 0.8286 (12) p (ST)         |               |
| PGRMC2   | 4 | LLKPGEEPSEYDEEDTKDHNKQD                  | 1.221   | 0.01793 (12) p (ST)        |               |
| PGRMC2   | 5 | LLKPGEEPSEYDEEDTKDHNKQD                  | 1.167   | 0.01493 (9) p (ST)         |               |
| PHF2     | 3 | ESASPTIPNLDLEAHTK                        | 0.6593  | 0.09732 (2) p (ST)         |               |
| PHF2     | 3 | ESASPTIPNLDLEAHTK                        | 0.6593  | 0.09732 (6) p (ST)         |               |
| NUP210   | 2 | DLAVPAALTPR                              | 0.8498  | 0.01846 (9) p (ST)         |               |
| PRRC2A   | 2 | LIPGLSPVAR                               | 0.6095  | 0.04117 (7) p (ST)         |               |
| PRKRA    | 2 | EDSGTFSLGK                               | 0.9999  | 0.04069 (3) p (ST)         |               |
| PRKRA    | 3 | AEAPPLEREDSGTFLGK                        | 0.4907  | 0.233 (11) p (ST)          |               |
| PSIP1    | 2 | QSNASSDVEVEEK                            | 1.184   | 0.1879 (6) p (ST)          |               |
| PSIP1    | 4 | TGVTSTSDSEEEGDDQEGEKKR                   | 0.6219  | 0.1233 (7) p (ST)          |               |
| PUM2     | 2 | QASPTTEVVER                              | 0.5308  | 0.1163 (3) p (ST)          |               |
| RBM15    | 3 | DRTPPLLYR                                | 0.7448  | 0.01463 (3) p (ST)         |               |
| RBM15    | 2 | SLSPGGGAALGYR                            | 0.7706  | 0.02223 (3) p (ST)         |               |
| EBAG9    | 3 | KLSDQDILPTTVDYSSVPK                      | 0.8441  | 0.02869 (3) p (ST)         |               |
| RCC1     | 3 | RRSPPADAFK                               | 0.8511  | 0.01599 (3) p (ST)         |               |
| RPL12    | 2 | IGPLGLSPK                                | 0.9054  | 0.03457 (7) p (ST)         |               |
| RPRD1B   | 4 | TFQQIEEEDDDYPGSYPQDPSAGPLTEELIK          | 0.4893  | 0.05211 (18) p (ST)        |               |
| RPS3     | 2 | DEILPTPISEOK                             | 1.348   | 0.07858 (14) p (ST)        |               |
| RPS3     | 4 | KPLPDHVSIVEPKDEILPTPISEOK                | 0.4817  | 0.151 (20) p (ST)          |               |
| SLC35B2  | 2 | AVPVESPQVKV                              | 0.9639  | 0.06393 (6) p (ST)         |               |
| SLC35B2  | 2 | KAVPVESPQVKV                             | 0.9507  | 0.07677 (7) p (ST)         |               |
| SLC35C2  | 2 | GLGSPDLELLLR                             | 0.3777  | 0.2572 (4) p (ST)          |               |
| SMAP     | 3 | SASPDDDLGSSNWEEAADLGNEER                 | 0.5969  | 0.9709 (3) p (ST)          |               |
| SNIP1    | 3 | QERLSPEVAPPARH                           | 0.6188  | 0.02212 (6) p (ST)         |               |
| SNIP1    | 3 | RPDHSGSGSPPTSEPAR                        | 43.25   | 1.397 (8) p (ST)           |               |
| SRF      | 3 | ALIQTLQNSPDSPRSDPTTDQR                   | 0.6832  | 0.04908 (12) p (ST)        |               |
| SRRM1    | 2 | RYSPSPPPK                                | 0.957   | 0.2308 (3) p (ST)          |               |
| SRRM1    | 3 | HRSPPATPPPK                              | 1.938   | 0.382 (4) p (ST)           |               |
| SRRM1    | 3 | HRSPPATPPPK                              | 0.5813  | 0.05095 (4/8) p (ST)       |               |
| SRRM1    | 3 | EKTELPPEPSVK                             | 0.7632  | 0.02191 (3) p (ST)         |               |
| SRRM1    | 3 | KVELSESEEDKGGK                           | 0.6744  | 0.1236 (5) p (ST)          |               |
| SRRM1    | 3 | KETESAEADNLDDLEK                         | 0.5255  | 0.04038 (5) p (ST)         |               |
| SRRM2    | 2 | GFSASPMK                                 | 0.6948  | 0.1041 (6) p (ST)          |               |
| SRRM2    | 2 | SSSPVTLEASR                              | 0.7555  | 0.06322 (3) p (ST)         |               |
| SRRM2    | 2 | SCFESSPDPELK                             | 0.5878  | 0.1016 (6) p (ST)          |               |
| SRRM2    | 3 | SSTPQCESYFGVSSQLK                        | 0.7358  | 0.1477 (3) p (ST)          |               |
| SRRM2    | 4 | GRGPSPEGSSSTESSPEHPK                     | 0.7115  | 0.1034 (15) p (ST)         |               |
| SRM2     | 4 | RGEADAPFSEPGTTSTQRPSSPETATK              | 0.7413  | 0.0383 (21) p (ST)         |               |
| SRRT     | 3 | TQLWASEPGTTPPLTSLPSQNPILK                | 0.6944  | 0.03041 (10) p (ST)        |               |
| SRSF11   | 3 | DYDEEEQGYDSEKEK                          | 0.4614  | 0.1508 (11) p (ST)         |               |
| SRSF9    | 3 | GSPHYFSPFRPY                             | 0.8182  | 0.02475 (2) p (ST)         |               |
| SSFA2    | 2 | SQSLPTTLSPVR                             | 0.6505  | 0.09345 (3) p (ST)         |               |
| SSRP1    | 2 | EFVSSDESSSGENK                           | 0.9139  | 0.09501 (9) p (ST)         |               |
| STMN1    | 2 | ASGOAFELLSPR                             | 0.3397  | 0.1112 (11) p (ST)         |               |
| STT3B    | 3 | ENPPVEDSSDEDDKR                          | 1.069   | 0.07752 (8) p (ST)         |               |
| STT3B    | 3 | ENPPVEDSSDEDDKR                          | 1.478   | 0.1932 (8/9) p (ST)        |               |
| TCOF1    | 3 | TSQVGAASAPAKESPR                         | 0.6248  | 0.05401 (14) p (ST)        |               |
| TCOF1    | 3 | LGAGEGGEASVSPEKTSTTSK                    | 0.846   | 0.06791 (12) p (ST)        |               |
| SUB1     | 3 | ELVSSSSSGSDSSEVDKK                       | 0.9933  | 0.0778 (12) p (ST)         |               |
| TERF2IP  | 2 | YLLGDAPVSPSSQK                           | 0.4253  | 0.07066 (9) p (ST)         |               |
| TMX1     | 3 | KVEEEQEADEEDVSEEEAEK                     | 0.4386  | 0.04346 (14) p (ST)        |               |
| TP53BP1  | 2 | STPFIVPSSPTEQGR                          | 0.4648  | 0.03843 (9) p (ST)         |               |
| SPAG1    | 3 | KQSLGELIGLTNAK                           | 0.5493  | 0.05823 (3) p (ST)         |               |
| SPAG1    | 4 | KQSLGELIGLTNAKVPADTEVVCAPPTAYIDFAR       | 0.2037  | 0.08737 (10) p (ST)        |               |
| THRAP3   | 2 | ASAVSELSR                                | 0.83    | 0.01135 (8) p (ST)         |               |
| THRAP3   | 2 | IDISPSTFR                                | 0.8023  | 0.04372 (4) p (ST)         |               |
| THRAP3   | 2 | IDISPSTFR                                | 0.9014  | 0.02172 (5) p (ST)         |               |
| THRAP3   | 3 | ERSPALKSPLQSVVVR                         | 0.6833  | 0.01584 (3) p (ST)         |               |
| UBE2J1   | 3 | RLSTSPDVIQGHQPR                          | 0.8016  | 0.1246 (3) p (ST)          |               |
| VDAC1    | 3 | LTDFSFSFNTGKK                            | 0.924   | 0.04589 (8) p (ST)         |               |
| VDAC2    | 3 | LTFTDTTFSNTGKK                           | 0.4555  | 0.1694 (8) p (ST)          |               |
| KIAA1429 | 2 | SFLSESPSPGR                              | 1.026   | 0.08994 (8) p (ST)         |               |
| ZNF828   | 2 | GGSPDLWK                                 | 0.9038  | 0.0415 (3) p (ST)          |               |

Table S2

| IDs        | Name                                                            | Diff |
|------------|-----------------------------------------------------------------|------|
| AOA5E5     | Putative uncharacterized protein                                | -1   |
| ACPP       | Acid phosphatase 1 isoform c variant                            | -1   |
| ACTA1      | Actin, alpha 1, skeletal muscle                                 | -1   |
| ACTG1      | Actin, cytoplasmic 2                                            | -1   |
| AIFM1      | Apoptosis-inducing factor, mitochondrion-associated, 1          | 1    |
| ALB        | Albumine                                                        | 1    |
| ALG1       | Chitobiosyldiphosphodolichol beta-mannosyltransferase           | -1   |
| ANKMY2     | Ankyrin repeat and MYND domain containing 2                     | 0    |
| ANXA2      | Annexin A2                                                      | -2   |
| ATP1A1     | Sodium/potassium-transporting ATPase subunit alpha-1            | -4   |
| ATPSA1     | ATP synthase subunit alpha, mitochondrial                       | 1    |
| BAG2       | BAG family molecular chaperone regulator 2                      | 1    |
| BRAF       | v-raf murine sarcoma viral oncogene homolog B1                  | 4    |
| C22orf28   | Putative uncharacterized protein HSPC117                        | -2   |
| CAD        | Carbamoyl-phos Sase 2, Asp transcarbamylase, and dihydroorotase | 0    |
| CAPRIN1    | Caprin-1                                                        | 0    |
| CAPZA1     | F-actin-capping protein subunit alpha-1                         | -1   |
| CCDC124    | Coiled-coil domain-containing protein 124                       | 0    |
| CCT2       | T-complex protein 1 subunit beta                                | -3   |
| CCT3       | T-complex protein 1 subunit gamma                               | -3   |
| CCT4       | T-complex protein 1, delta subunit                              | 1    |
| CCT5       | T-complex protein 1 subunit epsilon                             | -3   |
| CCT6A      | Chaperonin subunit 6A                                           | -1   |
| CCT7       | T-complex protein 1 subunit eta                                 | 0    |
| CCT8       | T-complex protein 1 subunit theta                               | 2    |
| CDC37      | Hsp90 co-chaperone Cdc37                                        | 1    |
| CDC45      | Cell division cycle 45 homolog                                  | -3   |
| CFL1       | Cofilin-1                                                       | -2   |
| CLNS1A     | Methylosome subunit pICln                                       | 0    |
| DDB1       | DNA damage-binding protein 1                                    | 3    |
| DDX1       | ATD-dpt RNA helicase DEAD box polypep 1                         | 0    |
| DDX17      | ATD-dpt RNA helicase DEAD box polypep 17                        | 1    |
| DDX3X      | ATD-dpt RNA helicase DEAD box polypep 3X                        | 2    |
| DDX5       | ATD-dpt RNA helicase DEAD box polypep 5                         | -2   |
| DDX6       | ATD-dpt RNA helicase DEAD box polypep 6                         | 1    |
| DHX9       | ATD-dpt RNA helicase DEAD box polypep 9                         | 2    |
| DNAJA2     | DnaJ (Hsp40) homolog, subfamily A, member 2                     | 1    |
| DNAJB1     | DnaJ homolog subfamily B member 1                               | -1   |
| DNAJC7     | DnaJ homolog subfamily C member 7                               | 3    |
| DNJA1      | DnaJ homolog subfamily A member 1                               | 1    |
| DNJA2      | DnaJ homolog subfamily A member 2                               | 1    |
| EEF1A1     | Elongation factor 1-alpha 1                                     | -3   |
| EEF1G      | Elongation factor 1-gamma                                       | -1   |
| EIF2S2     | Eukaryotic translation initiation factor 2, subu 2 beta         | -2   |
| EIF3B      | Eukaryotic translation initiation factor 3, subunit 9 eta       | 1    |
| EWSR1      | RNA-binding protein Ewing sarcoma breakpoint region 1           | -1   |
| FAM60A     | Transitional endoplasmic reticulum ATPase                       | -1   |
| FKBP5      | FK506-binding protein 5                                         | 8    |
| FKBP8      | FK506-binding protein 8                                         | 1    |
| FUS        | Fused in sarcoma                                                | 1    |
| G3BP1      | Ras GTPase-activating protein-binding protein 1                 | 1    |
| GDF5       | Growth differentiation factor 5                                 | 0    |
| GTF2I      | General transcription factor II-I                               | 3    |
| HAT1       | Histone acetyltransferase 1                                     | 1    |
| hCG2043616 | leucine-rich repeat-containing protein 15 isoform               | -1   |
| HLA-A      | HLA class I alpha chain                                         | 0    |
| → HNRNPA1  | Heterogeneous nuclear ribonucleoproteins A1                     | 4    |
| HNRNPA2B1  | Heterogeneous nuclear ribonucleoproteins A2/B1                  | 0    |
| HNRNPK     | Heterogeneous nuclear ribonucleoprotein K                       | -1   |
| HNRNPM     | Heterogeneous nuclear ribonucleoprotein M                       | 0    |
| HNRNPU     | Heterogeneous nuclear ribonucleoprotein U                       | 2    |
| HSP90AA1   | Heat shock protein HSP 90-alpha                                 | 5    |
| HSP90AB1   | Heat shock protein 90kDa alpha class B member 1                 | 6    |
| HSPA14     | Heat shock 70kDa protein 14                                     | 1    |
| HSPA1A     | Heat shock 70 kDa protein 1                                     | 4    |
| HSPA4L     | Heat shock 70 kDa protein 4-like protein                        | 0    |
| HSPA5      | 78 kDa glucose-regulated protein                                | 3    |
| HSPA6      | Heat shock 70 kDa protein 6                                     | 0    |
| HSPA8      | Heat shock cognate 71 kDa protein                               | -4   |
| HSPA9      | Stress-70 protein, mitochondrial                                | 3    |
| HSPD1      | 60 kDa heat shock protein, mitochondrial                        | 1    |
| HSPH1      | Heat shock protein 105 kDa                                      | -2   |
| IGF2BP1    | Insulin-like growth factor 2 mRNA-binding protein 1             | -1   |
| IPO5       | Importin 5                                                      | 0    |
| IPO7       | Importin-7                                                      | -1   |
| IQGAP1     | IQ motif containing GTPase activating protein 1                 | -2   |
| KIF2A      | Kinesin-like protein KIF2A                                      | 0    |
| KIF5B      | Kinesin-1 heavy chain                                           | 1    |
| KRT1       | Keratin, type II cytoskeletal 1                                 | -4   |
| KRT10      | Keratin, type I cytoskeletal 10                                 | -1   |
| KRT13      | Keratin, type I cytoskeletal 13                                 | 2    |
| KRT14      | Keratin, type I cytoskeletal 14                                 | -5   |
| KRT16      | Keratin, type I cytoskeletal 16                                 | -3   |
| KRT2       | Keratin, type II cytoskeletal 2 epidermal                       | 0    |
| KRT5       | Keratin, type II cytoskeletal 5                                 | -6   |
| KRT6A      | Keratin, type II cytoskeletal 6A                                | -2   |
| KRT9       | Keratin, type I cytoskeletal 9                                  | 0    |
| LRPPRC     | Leucine-rich PPR motif-containing protein, mitochondrial        | 2    |
| LTV1       | LTV1 homolog                                                    | -1   |
| LV302      | Ig lambda chain V-III region LOI                                | 0    |
| LYZ        | Lysozyme C                                                      | 1    |
| MAGED1     | Melanoma-associated antigen D1                                  | -1   |
| MAGED2     | Melanoma-associated antigen D2                                  | 2    |
| MCM3       | Cervical cancer proto-oncogene 5                                | -3   |
| MRPS22     | 28S ribosomal protein S22, mitochondrial                        | -1   |
| MSH6       | G/T mismatch-binding protein                                    | 0    |
| MYO1C      | Myosin-1c                                                       | 1    |
| NCL        | Nucleolin                                                       | 3    |
| NME3       | Non-metastatic cells 3, protein expressed in                    | -1   |
| NONO       | Non-POU domain-containing octamer-binding protein               | -3   |
| NPM1       | Nucleolar phosphoprotein B23                                    | 1    |
| NUDC       | Nuclear distribution gene C homolog                             | -1   |
| PCBP1      | Poly(rC)-binding protein 1                                      | -2   |
| PCMT1      | Protein-L-isoaspartate O-methyltransferase                      | 1    |
| PCNA       | Proliferating cell nuclear antigen                              | 2    |
| PDCD4      | Programmed cell death protein 4                                 | 2    |
| PHGDH      | Phosphoglycerate dehydrogenase                                  | 0    |
| POLDIP3    | DNA-directed polymerase , delta interacting protein 3           | -1   |
| PPM1G      | Protein phosphatase 1G                                          | -3   |
| PPP2CA     | S/T-protein phosphatase 2A catal subu alpha isoform             | -1   |
| PPP2R1A    | S/T-protein phosphatase 2A reg subu A alpha                     | -2   |
| PPP2R2A    | S/T-protein phosphatase 2A reg subu B alpha                     | 2    |
| PPP6R1     | Ser/thr-protein phosphatase 6 regulatory subu 1                 | 1    |
| PPP6R3     | Ser/thr-protein phosphatase 6 regulatory subu 3                 | -3   |
| PPYR1      | pancreatic polypeptide receptor 1                               | 0    |
| PRDX1      | Peroxisredoxin 1                                                | 3    |
| PRMT1      | Protein arginine N-methyltransferase 1                          | 0    |
| PRSS3      | Trypsin-3                                                       | 1    |
| PSMC1      | 26S protease regulatory subunit 4                               | 1    |
| PSMC2      | Proteasome (Prosome, macropain) 26S subunit, ATPase, 2          | -4   |
| PSMC3      | 26S protease regulatory subunit 6A                              | -1   |
| PSMD3      | proteasome 26S subu, non-ATPase, 3                              | -1   |
| PSPC1      | Paraspeckle component 1                                         | -2   |
| PTGES3     | Prostaglandin E synthase 3                                      | 0    |
| Q59GD0     | Polo-like kinase variant                                        | 0    |
| RBBP7      | Retinoblastoma binding protein 7                                | -1   |
| RPL13      | 60S ribosomal protein L13                                       | 1    |
| RPL14      | 60S ribosomal protein L14                                       | 0    |
| RPL17      | 60S ribosomal protein L17                                       | -1   |
| RPL19      | 60S ribosomal protein L19                                       | 1    |
| RPL22L1    | Ribosomal protein L22-like protein                              | 1    |
| RPL23A     | 60S ribosomal protein L23a                                      | 2    |
| RPL24      | Ribosomal protein L24                                           | 1    |
| RPL26      | 60S ribosomal protein L26                                       | 1    |
| RPL8       | 60S ribosomal protein L8                                        | 2    |
| RPN1       | Ribophorin I                                                    | -1   |
| RPS14      | Ribosomal protein S14                                           | 1    |
| RPS17      | 40S ribosomal protein S17                                       | -2   |
| RPS18      | 40S ribosomal protein S18                                       | -4   |
| RPS19      | 40S ribosomal protein S19                                       | -1   |
| RPS2       | 40S ribosomal protein S2                                        | -1   |
| RPS25      | 40S ribosomal protein S25                                       | -1   |
| RPS3       | Ribosomal protein S3                                            | -4   |
| RPS3A      | 40S ribosomal protein S3a                                       | -2   |
| RPS4X      | 40S ribosomal protein S4, X isoform                             | -1   |
| RPS5       | 40S ribosomal protein S5                                        | 1    |
| RPS6       | 40S ribosomal protein S6                                        | 0    |
| RPS7       | Ribosomal protein S7                                            | 2    |
| RPS8       | 40S ribosomal protein S8                                        | 1    |
| RUVBL1     | RuvB-like 1                                                     | 0    |
| RUVBL2     | RuvB-like 2                                                     | 2    |
| SERBP1     | Plasminogen activator inhibitor 1 RNA-binding protein           | 1    |
| SFPQ       | Splicing factor, proline- and glutamine-rich                    | 6    |
| SHROOM3    | Shroom family member 3                                          | 1    |
| SLC25A5    | ADP/ATP translocase 2                                           | 1    |
| SLC3A2     | 4F2 cell-surface antigen heavy chain                            | -1   |
| SNRPB      | Small nuclear ribonucleoprotein polypeptide B"                  | -1   |
| SSR1       | Translocon-associated protein subu alpha                        | -1   |
| STUB1      | STIP1 homology and U-box containing protein 1                   | 1    |
| SUGT1      | Suppressor of G2 allele of SKP1 homolog                         | -1   |
| TAF15      | RNA polymerase II, TBP-associated factor                        | -3   |
| TCP1       | T-complex protein 1 subunit alpha                               | 0    |
| TFAM       | Mitochondrial transcription factor A                            | 1    |
| TIMM50     | Mitochondrial import inner membrane translocase subu 50         | 0    |
| TUBA1B     | Tubulin alpha-1B chain                                          | -1   |
| TUBA1C     | Tubulin alpha-1C chain                                          | -1   |
| TUBB       | Tubulin beta chain                                              | -1   |
| TUBB2C     | Tubulin beta-2C chain                                           | 0    |
| TUBB3      | Tubulin beta-3 chain                                            | 0    |
| TUBB6      | Tubulin beta-6 chain                                            | -1   |
| TUFM       | Elongation factor Tu, mitochondrial                             | 0    |
| UBIQ       | Ubiquitin                                                       | 0    |
| USP7       | Ubiquitin carboxyl-terminal hydrolase 7                         | 2    |
| USP9X      | Ubiquitin specific peptidase 9, X-linked                        | 2    |
| WBSR22     | Williams Beuren syndrome chromosome region 22                   | -1   |
| WRNIP1     | Werner helicase interacting protein 1                           | 2    |
| XRCC5      | X-ray repair complementing defective in Chinese hamster cells 5 | 0    |
| YBX1       | Nuclease-sensitive element-binding protein 1                    | 1    |
| YTHDF2     | YTH domain family protein 2                                     | -2   |
| YWHAH      | 14-3-3 protein eta                                              | 1    |
| YWHAQ      | Tyr 3-/Trp 5-monooxygenase activation prot, theta polypep       | -1   |



Table S3

| ID       | Z | Sequence                                    | L/H    | Std. Err.             | Modifications |
|----------|---|---------------------------------------------|--------|-----------------------|---------------|
| AP00L    | 2 | LGSSSEIEVPAK                                | 0.9716 | 0.07473 (4) p (ST)    |               |
| AP00L    | 2 | LGSSSEIEVPAK                                | 0.9716 | 0.07473 (3) p (ST)    |               |
| BCIAF1   | 2 | IDISPSTLR                                   | 0.9337 | 0.02592 (4) p (ST)    |               |
| BCIAF1   | 3 | IDISPSTLRK                                  | 0.9943 | 0.05885 (4) p (ST)    |               |
| BCIAF1   | 2 | RIDISPSTLR                                  | 1.026  | 0.02483 (5) p (ST)    |               |
| BCIAF1   | 3 | DLFDYSPPLHK                                 | 0.847  | 0.03403 (6) p (ST)    |               |
| BCIAF1   | 2 | KAEGEPQEE SPLK                              | 0.9641 | 0.0352 (10) p (ST)    |               |
| BCIAF1   | 3 | LKDLFDYSPPLHK                               | 0.9087 | 0.03193 (8) p (ST)    |               |
| BCIAF1   | 3 | KAEGEPQEE SPLKSK                            | 0.9401 | 0.03384 (10) p (ST)   |               |
| CANX     | 4 | OKSDAEEDGGTVSQEEEDRKPK                      | 1.017  | 0.03517 (3) p (ST)    |               |
| CANX     | 4 | OKSDAEEDGGTVSQEEEDRKPK                      | 0.9109 | 0.01956 (3/13) p (ST) |               |
| CERS2    | 4 | LVEDERSDREETESSEGEAAAGGGAK                  | 0.7982 | 0.04767 (7) p (ST)    |               |
| CERS2    | 4 | LVEDERSDREETESSEGEAAAGGGAK                  | 0.7982 | 0.04767 (12) p (ST)   |               |
| CERS4    | 3 | SDVEESDSSEAAAAQELQLK                        | 0.732  | 0.05889 (8) p (ST)    |               |
| CIR1     | 3 | NLTANDPSQEVYVASEGEEDPEVEFLK                 | 0.8518 | 0.03777 (14) p (ST)   |               |
| COBRA1   | 3 | KPSPAQAAETPALELPLSPVPAPAPL                  | 0.9109 | 0.01961 (3) p (ST)    |               |
| CTAGE5   | 2 | AFLSPPTLLEGLPR                              | 0.8464 | 0.04096 (4) p (ST)    |               |
| CTNND1   | 3 | GSLSLDSLRLK                                 | 0.7647 | 0.1562 (8) p (ST)     |               |
| DXH9     | 5 | SEEVPAFGVASPPPLTDTPTTANAEGDLPTTMGGPLPPLHALK | 0.8341 | 0.08473 (11) p (ST)   |               |
| DKC1     | 2 | AGLESQAEPQDQSDDTTK                          | 0.8505 | 0.04068 (14) p (ST)   |               |
| DNAJC5   | 3 | SLSTSGESLYHVLGDK                            | 1.146  | 0.02592 (1) p (ST)    |               |
| DNAJC5   | 3 | SLSTSGESLYHVLGDK                            | 1.12   | 0.01924 (3) p (ST)    |               |
| DNAJC5   | 4 | SLSTSGESLYHVLGDKNATSDDIKK                   | 0.9176 | 0.007932 (3) p (ST)   |               |
| DSG2     | 3 | VVPSPFLVDQGGSLVGR                           | 0.9982 | 0.06179 (13) p (ST)   |               |
| DSP      | 3 | SSFSFSDTLEESSPIAIFDTENLEK                   | 0.865  | 0.04258 (2) p (ST)    |               |
| DSP      | 3 | SSFSFSDTLEESSPIAIFDTENLEK                   | 0.865  | 0.04258 (7) p (ST)    |               |
| DTD1     | 2 | SASSGAEGDVSSEREP                            | 0.7591 | 0.06806 (4) p (ST)    |               |
| EBAG9    | 3 | KLSGDQITPTTVDYSSVVK                         | 0.8605 | 0.03228 (3) p (ST)    |               |
| EEF1D    | 3 | ATAPQTOHVSPMR                               | 0.6694 | 0.02365 (10) p (ST)   |               |
| EIF2B1   | 2 | QGSPPVAAGAPAK                               | 0.9968 | 0.0263 (3) p (ST)     |               |
| EIF3G    | 4 | GIPLATGDTSPPEPLTLPALPPPK                    | 0.9113 | 0.05062 (10) p (ST)   |               |
| EIF5B    | 3 | NKPGPNIESGNEEDDASF                          | 0.8088 | 0.04501 (9) p (ST)    |               |
| FAM54B   | 2 | NASVPNLR                                    | 0.8438 | 0.05184 (3) p (ST)    |               |
| FAM54B   | 2 | ASSFADMMGILK                                | 0.593  | 0.1001 (3) p (ST)     |               |
| FARP1    | 2 | LGAPENSGLTLER                               | 0.9069 | 0.03999 (11) p (ST)   |               |
| FOXK1    | 3 | EGSPIPHDFGSK                                | 0.9948 | 0.04704 (3) p (ST)    |               |
| G3BP1    | 2 | SSSPAPADIAQTQEDLR                           | 0.9217 | 0.08376 (3) p (ST)    |               |
| GFP1T    | 2 | VDTTCLFPVEEK                                | 1      | 0.02452 (3) p (ST)    |               |
| GORASP2  | 3 | VGDSTPVSEKPVSAAVDANASESP                    | 0.8271 | 0.03414 (23) p (ST)   |               |
| GSK3B    | 2 | GEPNVSYICSR                                 | 0.9331 | 0.04698 (7) p (Y)     |               |
| HDGF     | 3 | AGDILLEDSPKRPK                              | 0.8422 | 0.06093 (8) p (ST)    |               |
| HDGF     | 4 | RAGDILLEDSPKRPK                             | 0.723  | 0.04047 (9) p (ST)    |               |
| HMG1A    | 3 | KLKEEEEEEGSQSESEEEQ                         | 0.7618 | 0.05164 (14) p (ST)   |               |
| HMG1A    | 4 | KOPPYSPGATLVSQKEPSEVPTPK                    | 0.9048 | 0.02954 (14) p (ST)   |               |
| HNRNPA3  | 2 | SSGSPYGGGYGSGGGSGGYGSR                      | 0.9461 | 0.03465 (4) p (ST)    |               |
| HNRNPK   | 5 | IPTLEEGQLPSPATSLQLPLESDAVECLNYQHYK          | 0.7945 | 0.01811 (17) p (ST)   |               |
| HNRNPK   | 4 | IPTLEEGQLPSPATSLQLPLESDAVECLNYQHYK          | 0.8176 | 0.0176 (13) p (ST)    |               |
| HNRNPK   | 5 | KIIPITLEEGQLPSPATSLQLPLESDAVECLNYQHYK       | 0.7708 | 0.05395 (19) p (ST)   |               |
| HNRNPU   | 5 | AKSPQPPVEEEDHFDDTVVCLDTYNCDLHFK             | 0.7828 | 0.01885 (3) p (ST)    |               |
| HNRNPU   | 5 | AKSPQPPVEEEDHFDDTVVCLDTYNCDLHFK             | 0.7828 | 0.01885 (18) p (ST)   |               |
| HNRNPUL2 | 2 | SGDETGPSEVPQDK                              | 0.9683 | 0.07622 (1) p (ST)    |               |
| HSP90AA1 | 3 | ESEDKPEIEDVGSDEEEEEK                        | 0.7535 | 0.0578 (13) p (ST)    |               |
| HSP90AB1 | 3 | IEDVGSDEEDDSGDKDK                           | 2.306  | 0.08044 (6) p (ST)    |               |
| HSP90AB1 | 3 | IEDVGSDEEDDSGDKDK                           | 1.627  | 0.05836 (6) p (ST)    |               |
| HSPD1    | 2 | TVIEQSWGSPK                                 | 0.9687 | 0.03856 (10) p (ST)   |               |
| HSPD1    | 3 | ALMLQGVDLLADAVAVTMGPK                       | 0.7533 | 0.06721 (3/18) o (M)  |               |
| KHDRBS1  | 5 | ASPATQPPLLPSPATGPDATVGGPAPTLLPPSATASVK      | 0.9461 | 0.04577 (2) p (ST)    |               |
| KIAA1429 | 2 | SFLSEPPSPGR                                 | 1.122  | 0.1307 (8) p (ST)     |               |
| KIF1A    | 3 | SDSLLDHQWELEK                               | 0.9571 | 0.05673 (3) p (ST)    |               |
| KRI1     | 3 | AFVEDSEDEDGAGEGGSSLLQK                      | 0.8568 | 0.06957 (6) p (ST)    |               |
| MAP1B    | 2 | SDISPLTPR                                   | 0.5232 | 0.1389 (7) p (ST)     |               |
| MAP1B    | 3 | EVPSKEEPSPVKAIEVAEK                         | 1.175  | 0.04861 (9) p (ST)    |               |
| MAP1B    | 4 | KLGDVSPTOIDVQFGSFKEDTK                      | 0.6615 | 0.05714 (6) p (ST)    |               |
| MAP1B    | 4 | VLSPILRSPPLIGSESAYESFLSADDKASGR             | 0.7465 | 0.01736 (7) p (ST)    |               |
| MAP1B    | 4 | VLSPILRSPPLIGSESAYESFLSADDKASGR             | 0.6473 | 0.04706 (3/7) p (ST)  |               |
| MAP1B    | 4 | TELSPSFINPNPLEWFASEEPTESEKPLTQSGGAPPPPGGK   | 0.7965 | 0.01479 (4) p (ST)    |               |
| MAP1B    | 4 | TELSPSFINPNPLEWFASEEPTESEKPLTQSGGAPPPPGGK   | 0.7963 | 0.01477 (6) p (ST)    |               |
| MAP1B    | 5 | TELSPSFINPNPLEWFASEEPTESEKPLTQSGGAPPPPGGK   | 0.7743 | 0.02306 (6) p (ST)    |               |
| MAP4     | 3 | VGSLDNVGHLPAGGAVK                           | 0.8019 | 0.09142 (3) p (ST)    |               |
| MATR3    | 4 | RDSFDDRGSLNPLVDYDHGSR                       | 0.7213 | 0.01179 (3) p (ST)    |               |
| MYEF2    | 3 | AEVPGATGGDSPHLQPAEPPGEP                     | 1.201  | 0.02592 (11) p (ST)   |               |
| MYH9     | 3 | KGAGDGSDEEDVGKADGAIAKPAE                    | 0.7672 | 0.05487 (7) p (ST)    |               |
| NACA     | 4 | VQGEAVSNIQENTQPTVQEESEEEVDETGEVEK           | 0.9373 | 0.02581 (22) p (ST)   |               |
| NDRG1    | 2 | TASGSSVTSLDGTR                              | 0.7639 | 0.02355 (3) p (ST)    |               |
| NIPBL    | 2 | AITSLGSGGSPK                                | 0.7237 | 0.07841 (10) p (ST)   |               |
| NOL9     | 4 | LAADFADALEFADEEKESPVFEFTGHK                 | 0.7263 | 0.09405 (17) p (ST)   |               |
| NOLC1    | 3 | AESSNSSSSDDSSSEEEEEKLK                      | 1.061  | 0.05673 (7) p (ST)    |               |
| NOLC1    | 3 | AESSNSSSSDDSSSEEEEEKLK                      | 1.061  | 0.05673 (6) p (ST)    |               |

|         |   |                                                |          |                     |
|---------|---|------------------------------------------------|----------|---------------------|
| NOLC1   | 4 | SSDSDDSSSEDEPPKNQKPK                           | 0.9715   | 0.01445 (4) p (ST)  |
| NOLC1   | 4 | SSDSDDSSSEDEPPKNQKPK                           | 0.9735   | 0.01417 (9) p (ST)  |
| NOLC1   | 3 | AASSSSSSSSSSSSDDSEEEKAAATPK                    | 0.7654   | 0.04805 (7) p (ST)  |
| NOLC1   | 4 | KASSSDSEDSSEEEEEVOGPPAKK                       | 0.7794   | 0.05618 (3) p (ST)  |
| NOLC1   | 4 | AASSSSSSSSSSSSDDSEEEKAAATPK                    | 0.7654   | 0.04805 (3) p (ST)  |
| NOLC1   | 4 | KASSSDSEDSSEEEEEVOGPPAKK                       | 0.7794   | 0.05618 (5) p (ST)  |
| NOLC1   | 4 | ASESSSSSEESSDDDDDEEDQKKOPVOK                   | 0.9112   | 0.01664 (6) p (ST)  |
| NOLC1   | 4 | ASESSSSSEESSDDDDDEEDQKKOPVOK                   | 0.9112   | 0.01664 (10) p (ST) |
| NOLC1   | 4 | QQPVESSEDSDESDDSSSEEEKKPPTK                    | 0.8908   | 0.02328 (16) p (ST) |
| NOLC1   | 4 | QQPVESSEDSDESDDSSSEEEKKPPTK                    | 0.8908   | 0.02328 (17) p (ST) |
| NOP58   | 4 | HIKEEPLSEEEECTSTAIA SPEK                       | 1.331    | 0.1888 (8) p (ST)   |
| NOP58   | 4 | HIKEEPLSEEEECTSTAIA SPEK                       | 0.7663   | 0.09106 (8) p (ST)  |
| NPM1    | 4 | CGSGPVHISQHLVAVEEDAEEDEEEEDVK                  | 1.101    | 0.02527 (22) p (ST) |
| NUMA1   | 3 | KNLSLISLEEEVSILNR                              | 0.8451   | 0.07158 (3) p (ST)  |
| NUP35   | 2 | TLGTITQPGSTPR                                  | 1.081    | 0.05633 (4) p (ST)  |
| P4HB    | 4 | FLESGGGDGAAGDDDDLEEEAEEDMEEDDDQK               | 3.394    | 0.04367 (27) o (M)  |
| PGK1    | 3 | ALESERPFLAILGGAK                               | 0.8497   | 0.01295 (4) p (ST)  |
| PGRMC1  | 3 | GDOQPAASGDSDDDDEPPPLPR                         | 0.7589   | 0.05616 (10) p (ST) |
| PGRMC1  | 3 | EGEETPVYSDEEEKPDESAR                           | 1.266    | 0.0312 (9) p (ST)   |
| PGRMC1  | 4 | IVRGDQPAASGDSDDDDEPPPLPR                       | 0.7134   | 0.02287 (10) p (ST) |
| PGRMC1  | 4 | EGEETPVYSDEEEKPDESARK                          | 0.8134   | 0.04398 (9) p (ST)  |
| PNISR   | 4 | QRSPIALPVKEPPQIDAVK                            | 0.8566   | 0.03866 (3) p (ST)  |
| PRKACA  | 3 | TWTLCGTPEYLAPEILSK                             | 0.9055   | 0.02777 (3) p (ST)  |
| PRKACA  | 3 | GRTWTLCGTPEYLAPEILSK                           | 0.7148   | 0.02782 (5) p (ST)  |
| PRKAR1A | 3 | TDSEDEISPPPPMPVVVK                             | 0.9503   | 0.01107 (9) p (ST)  |
| PRPF4B  | 3 | LCDFGSASHVADNDITPYLVSR                         | 1.158    | 0.03175 (18) p (Y)  |
| PSIP1   | 2 | QSNASSDVEVEEK                                  | 1.026    | 0.1402 (6) p (ST)   |
| RBM15   | 2 | SLSPGGGAALGYR                                  | 0.9154   | 0.02346 (3) p (ST)  |
| RBM39   | 2 | YRSPYSGP                                       | 0.9017   | 0.06593 (3) p (ST)  |
| RBM39   | 3 | YRSPYSGP                                       | 0.000027 | 0.153 (3) p (ST)    |
| RBMX2   | 2 | EVQAEQPSSSSPR                                  | 0.9258   | 0.04553 (10) p (ST) |
| RBMX2   | 2 | EVQAEQPSSSSPR                                  | 0.9258   | 0.04553 (11) p (ST) |
| RCC1    | 3 | RRSPPADAIK                                     | 0.8344   | 0.01407 (3) p (ST)  |
| RPL12   | 2 | IGPLGLSPK                                      | 0.8161   | 0.034 (7) p (ST)    |
| RPLP0   | 5 | AFLADPFAVAAAPVAAATAAPAAAAAPAKVEAKEESEDEDMGFLFD | 0.6218   | 0.08874 (41) p (ST) |
| RPLP2   | 3 | VYVASYLLAALGNGSSPSAK                           | 1.002    | 0.02125 (15) p (ST) |
| RPLP2   | 2 | KEESEESDDMGFLFD                                | 0.765    | 0.02764 (11) o (M)  |
| RPRD1B  | 4 | TFQQIEEEDDDYPGSYSPQDPSAGPLLTELIK               | 0.7185   | 0.04067 (18) p (ST) |
| RPRD1B  | 5 | TFQQIEEEDDDYPGSYSPQDPSAGPLLTELIK               | 0.8116   | 0.02616 (18) p (ST) |
| RPS3    | 2 | DEILPTPISEIQ                                   | 1.258    | 0.03964 (7) p (ST)  |
| SCAF4   | 5 | EIIQPLDMAAGTSNAAAPVAENVNNEGSPPPPVK             | 0.8588   | 0.04688 (30) p (ST) |
| SLC35B2 | 2 | AVPVESPQVK                                     | 1.054    | 0.07057 (6) p (ST)  |
| SLC35C2 | 2 | GLGSSPDLELLLR                                  | 0.8965   | 0.02242 (4) p (ST)  |
| SMARCA5 | 4 | GGPEGVAAQAVASASAGPADAEMEEFDDASPGKQK            | 0.7985   | 0.1748 (32) p (ST)  |
| SNIP1   | 3 | QERLSPEVAPPAHR                                 | 0.8666   | 0.01985 (5) p (ST)  |
| SPAG1   | 3 | KQSLGELIGTLNAAK                                | 0.8809   | 0.03595 (3) p (ST)  |
| SPAG1   | 4 | KQSLGELIGTLNAAKVPADTEVVCAPPTAYIDFAR            | 0.5266   | 0.05803 (10) p (ST) |
| SRRM1   | 3 | HRPSPPATPPPK                                   | 0.7073   | 0.06718 (4) p (ST)  |
| SRRM1   | 3 | HRPSPPATPPPK                                   | 0.7098   | 0.1964 (4/8) p (ST) |
| SRRM1   | 3 | EKTPPELPEPSVK                                  | 0.8477   | 0.01698 (3) p (ST)  |
| SRRM2   | 3 | SSTPPGESYFGVSSSLQLK                            | 0.9402   | 0.04744 (3) p (ST)  |
| SRRM2   | 4 | RGEADAPFSEP GTTS TORPSSPETATK                  | 0.9994   | 0.03512 (20) p (ST) |
| SRRM2   | 4 | RGEADAPFSEP GTTS TORPSSPETATK                  | 0.9994   | 0.03512 (21) p (ST) |
| SRR1    | 4 | TQLWASEPGTTPPLTSLPSQNPILK                      | 0.9309   | 0.05332 (10) p (ST) |
| SRR1    | 3 | TQLWASEPGTTPPLTSLPSQNPILK                      | 1.002    | 0.02693 (10) p (ST) |
| SRSF9   | 3 | GSPHYFSPFRPY                                   | 0.9695   | 0.01236 (2) p (ST)  |
| STT3B   | 3 | ENPPVEDSSDEDDKR                                | 1.109    | 0.05264 (8) p (ST)  |
| STT3B   | 3 | ENPPVEDSSDEDDKR                                | 1.109    | 0.05264 (9) p (ST)  |
| SUB1    | 3 | ELVSSSSSGSDSDSEVDKK                            | 0.8291   | 0.05701 (12) p (ST) |
| SUB1    | 3 | ELVSSSSSGSDSDSEVDKK                            | 0.8291   | 0.05701 (10) p (ST) |
| SUB1    | 3 | SKELVSSSSSGSDSDSEVDKK                          | 0.5331   | 0.09591 (14) p (ST) |
| TCEA1   | 3 | KKKEPAITSQNSPEAR                               | 0.7926   | 0.02504 (11) p (ST) |
| TCOF1   | 3 | TSQVGAASAPAKESPR                               | 0.7965   | 0.0557 (14) p (ST)  |
| TCOF1   | 3 | LGAGEGGEASVSPEKTSITTSK                         | 0.8489   | 0.1059 (12) p (ST)  |
| TERF2IP | 2 | YLLGDAPVSPSSQK                                 | 0.3456   | 0.07801 (9) p (ST)  |
| THRAP3  | 2 | ASAVSELSPR                                     | 0.9358   | 0.01925 (8) p (ST)  |
| THRAP3  | 2 | IDISPSTFR                                      | 0.9216   | 0.01826 (4) p (ST)  |
| THRAP3  | 2 | RIDISPSTFR                                     | 1.046    | 0.01121 (5) p (ST)  |
| THRAP3  | 3 | IDISPSTFRK                                     | 0.9703   | 0.0301 (4) p (ST)   |
| THRAP3  | 3 | ERSPALKSPQSVVVR                                | 0.8625   | 0.02384 (3) p (ST)  |
| TMPO    | 2 | SSTPLPTISSAENTR                                | 1.548    | 0.03367 (3) p (ST)  |
| TMPO    | 5 | NRPPLPAGTNSKGPPDFSSDEEREPTVLGSGAAAAAGR         | 0.6283   | 0.0464 (19) p (ST)  |
| TMX1    | 3 | KVEEEQEADEEDVSEEEAESK                          | 1.056    | 0.04561 (14) p (ST) |
| TP53BP1 | 2 | STPFIVPSSPTEQGR                                | 0.7914   | 0.03368 (9) p (ST)  |
| UBE21   | 3 | RLSTSPDVQGHQPR                                 | 0.9708   | 0.08069 (3) p (ST)  |
| UBE21   | 3 | RLSTSPDVQGHQPR                                 | 0.9857   | 0.07487 (5) p (ST)  |
| WRAP53  | 3 | VFPPEPTESGDEEELGLPLLSTR                        | 0.9362   | 0.01495 (8) p (ST)  |
| ZRANB2  | 3 | EVEDKESEGEDEDEDLSK                             | 1.887    | 0.05523 (7) p (ST)  |

## Table S4

| IDs       | Name                                                      | Diff |           |                                                        |    |          |                                                           |
|-----------|-----------------------------------------------------------|------|-----------|--------------------------------------------------------|----|----------|-----------------------------------------------------------|
| A2ML1     | Alpha-2-macroglobulin-like 1                              | 3    | IGF2BP2   | Insulin-like growth factor 2 mRNA binding protein 2    | 0  | PTCD3    | Pentatricopeptide repeat domain 3                         |
| ACTB      | Actin, beta                                               | 2    | IGH@ prot | IGH@ protein                                           | 4  | Q2I377   | Small proline rich protein                                |
| ADA       | Adenosine deaminase                                       | 1    | IGK@ prot | IGK@ protein                                           | 6  | Q5K634   | SCCA2/SCCA1 fusion protein isoform 1                      |
| AKAP8     | A kinase (PRKA) anchor protein 8                          | 3    | IGL@      | IGL@                                                   | 2  | RAB5A    | RAB5A, member RAS oncogene family                         |
| AKR1B10   | Aldo-keto reductase family 1, member B10                  | -3   | IL36G     | Interleukin 36, gamma                                  | -2 | RALY     | RNA binding protein, autoantigenic                        |
| ALB       | Albumin                                                   | 15   | ILF2      | interleukin enhancer binding factor 2                  | -2 | RBM14    | RNA binding motif protein 14                              |
| ALDOA     | Aldolase A, fructose-bisphosphate                         | -2   | ILF3      | Interleukin enhancer binding factor 3                  | 3  | RBM45    | RNA binding motif protein 45                              |
| ANGEL2    | Angel homolog 2                                           | 0    | IVL       | Involucrin                                             | 0  | RBM6     | RNA binding motif protein 6                               |
| ANXA1     | Annexin A1                                                | -3   | JUP       | Junction plakoglobin                                   | 8  | RBMX     | Heterogeneous nuclear ribonucleoprotein G                 |
| ANXA2     | Annexin A2                                                | 1    | KHSRP     | KH-type splicing regulatory protein                    | 2  | RNMT     | RNA (guanine-7-) methyltransferase                        |
| ARF3      | ADP-ribosylation factor 3                                 | 0    | KIAA1967  | KIAA1967                                               | -2 | RPL10    | Ribosomal protein L10                                     |
| ARG1      | Arginase, liver                                           | -4   | KPRP      | Keratinoocyte proline-rich protein                     | -1 | RPL11    | Ribosomal protein L11                                     |
| ASPRV1    | Aspartic peptidase, retroviral-like 1                     | 1    | KRT1      | Keratin 1                                              | -1 | RPL13    | Ribosomal protein L13                                     |
| ATP5A1    | ATP ̳ase, H+ transporting, mito F1 complex, alpha 1       | 3    | KRT10     | Keratin 10                                             | -1 | RPL15    | Ribosomal protein L15                                     |
| ATP5B     | ATP ̳ase, mitochon F1 complex, beta polypep               | 1    | KRT14     | Keratin 14                                             | 5  | RPL17    | Ribosomal protein L17                                     |
| B2RS55    | Ser-Thr kinase receptor-associated protein                | -8   | KRT15     | Keratin 15                                             | 2  | RPL19    | Ribosomal protein L19                                     |
| B2NR6     | Zinc finger RNA binding protein                           | 1    | KRT16     | Keratin 16                                             | 0  | RPL23    | Ribosomal protein L23                                     |
| C14orf166 | Chromosome 14 open reading frame 166                      | -3   | KRT17     | Keratin 17                                             | 3  | RPL23A   | Ribosomal protein L23a                                    |
| C1orf68   | Chromosome 1 open reading frame 68                        | 2    | KRT2      | Keratin 2                                              | 8  | RPL24    | Ribosomal protein L24                                     |
| C22orf28  | Chromosome 22 open reading frame 28                       | -2   | KRT33A    | Keratin 33A                                            | 3  | RPL26    | Ribosomal protein L26                                     |
| C3        | Complement component 3                                    | 4    | KRT34     | Keratin 34                                             | -2 | RPL27A   | Ribosomal protein L27a                                    |
| CALML3    | Calmodulin-like 3                                         | -2   | KRT5      | Keratin 5                                              | -3 | RPL3     | Ribosomal protein L3                                      |
| CALML5    | Calmodulin-like 5                                         | -1   | KRT6A     | Keratin 6A                                             | 0  | RPL31    | Ribosomal protein L31                                     |
| CANX      | Calnexin                                                  | 0    | KRT6B     | keratin 6B                                             | -1 | RPL4     | Ribosomal protein L4                                      |
| CAPRN1    | Cell cycle associated protein 1                           | 5    | KRT6B     | Keratin 6B                                             | 0  | RPL6     | Ribosomal protein L6                                      |
| CKDN2A1F  | CKDN2A interacting protein                                | -1   | KRT6C     | Keratin 6C                                             | 4  | RPL7     | Ribosomal protein L7                                      |
| CLF1      | Cofilin 1                                                 | -3   | KRT6C     | Keratin 6C                                             | -2 | RPL7A    | Ribosomal protein L7a                                     |
| CKMT1A    | Creatine kinase, mitochondrial 1A                         | 1    | KRT78     | Keratin 78                                             | 1  | RPL8     | Ribosomal protein L8                                      |
| CLTC      | Clathrin, heavy chain (Hc)                                | 0    | KRT79     | Keratin 79                                             | 7  | RPLP0    | Ribosomal protein, large, P0                              |
| CSDA      | Cold shock domain protein A                               | -1   | KRT80     | Keratin 80                                             | -2 | RPS10    | ribosomal protein S10                                     |
| CTSD      | Cathepsin D                                               | 6    | KRT83     | keratin 83                                             | 13 | RPS11    | Ribosomal protein S11                                     |
| DAP3      | Death associated protein 3                                | 0    | KRT9      | Keratin 9                                              | 4  | RPS13    | ribosomal protein S13                                     |
| DCD       | Dermcidin                                                 | 1    | KV303     | Ig kappa chain V-III region NG9                        | 2  | RPS15A   | Ribosomal protein S15a                                    |
| DDX1      | DEAD box polypeptide 1                                    | 1    | LAMP1     | Lysosomal-associated membrane protein 1                | 2  | RPS16    | Ribosomal protein S16                                     |
| DDX17     | DEAD box polypeptide 17                                   | 2    | LARP1     | La ribonucleoprotein domain family, member 1           | -1 | RPS17    | Ribosomal protein S17                                     |
| DDX28     | DEAD box polypeptide 28                                   | 0    | LARP3     | Autoantigen La                                         | 0  | RPS18    | Ribosomal protein S18                                     |
| DDX3X     | DEAH box polypeptide 3, X-linked                          | 0    | LARP7     | La ribonucleoprotein domain family, member 7           | 1  | RPS19    | Ribosomal protein S19                                     |
| DDX5      | DEAH box polypeptide 5                                    | 0    | LCN2      | Lipocalin 2                                            | 3  | RPS2     | Ribosomal protein S2                                      |
| DDX6      | DEAD box polypeptide 6                                    | -3   | LDHA      | Lactate dehydrogenase A                                | 1  | RPS20    | Ribosomal protein S20                                     |
| DHX15     | DEAH box polypeptide 15                                   | 6    | LGALS7    | Lectin, galactoside-binding, soluble, 7                | 1  | RPS25    | Ribosomal protein S25                                     |
| DHX30     | DEAH box polypeptide 30                                   | -1   | LMNA      | lamin A/C                                              | 1  | RPS28    | Ribosomal protein S28                                     |
| DHX36     | DEAH box polypeptide 36                                   | 2    | LRPPRC    | Leucine-rich PPR-motif containing                      | -4 | RPS3     | Ribosomal protein S3                                      |
| DHX9      | DEAH box polypeptide 9                                    | 1    | LTV1      | LTV1 homolog                                           | 1  | RPS3A    | Ribosomal protein S3A                                     |
| DIMT1L    | DIM1 dimethyladenosine transferase 1-like                 | 2    | MARK2     | MAP/microtubule affinity-regulating kinase 2           | 1  | RPS4X    | Ribosomal protein S4, X-linked                            |
| DJNC10    | DnaJ (Hsp40) homolog, subfamily C, member 10              | 2    | MATR3     | Matrin 3                                               | 2  | RPS5     | Ribosomal protein S5                                      |
| DSG1      | Desmoglein 1                                              | 3    | MOV10     | Mov10, Moloney leukemia virus 10, homolog              | 4  | RPS6     | Ribosomal protein S6                                      |
| DSP       | Desmoplakin                                               | 2    | MRP1      | Mitochondrial ribosomal protein L1                     | 0  | RPS6KA1  | Ribosomal protein S6 kinase, 90kDa, polypeptide 1         |
| EEF1A1    | Eukaryotic translation elongation factor 1 alpha 1        | 5    | MRPL11    | Mitochondrial ribosomal protein L11                    | 1  | RPS7     | Ribosomal protein S7                                      |
| EEF1G     | Eukaryotic translation elongation factor 1 gamma          | 0    | MRPL15    | Mitochondrial ribosomal protein L15                    | -1 | RPS8     | Ribosomal protein S8                                      |
| EEF2      | Eukaryotic translation elongation factor 2                | 1    | MRPL18    | Mitochondrial ribosomal protein L18                    | 0  | RPS9     | Ribosomal protein S9                                      |
| EIF2B1    | Eukaryotic translation initiation factor 2B, subu 1 alpha | -5   | MRPL19    | Mitochondrial ribosomal protein L19                    | -2 | RPSA     | Ribosomal protein SA                                      |
| EIF283    | eukaryotic translation initiation factor 2B, subu 3 gamma | 1    | MRP122    | Mitochondrial ribosomal protein L22                    | 0  | S100A11  | S100 calcium binding protein A11                          |
| EIF3H     | Eukaryotic translation initiation factor 3, subu H        | 0    | MRP124    | Mitochondrial ribosomal protein L24                    | -1 | S100A14  | S100 calcium binding protein A14                          |
| EIF4A2    | Eukaryotic translation initiation factor 4A2              | 0    | MRPL3     | Mitochondrial ribosomal protein L3                     | 1  | S100A16  | S100 calcium binding protein A16                          |
| EIF4A3    | Eukaryotic translation initiation factor 4A3              | 1    | MRPL37    | Mitochondrial ribosomal protein L37                    | -3 | S100A2   | S100 calcium binding protein A2                           |
| ELAVL1    | ELAV-like 1 (Hu antigen R)                                | 2    | MRPL38    | Mitochondrial ribosomal protein L38                    | 0  | S100A7   | S100 calcium binding protein A7                           |
| ENO1      | Enolase 1                                                 | -5   | MRPL39    | Mitochondrial ribosomal protein L39                    | -1 | S100A8   | S100 calcium binding protein A8                           |
| EPPK1     | Epiplakin 1                                               | -6   | MRPL43    | Mitochondrial ribosomal protein L43                    | 2  | S100A9   | S100 calcium binding protein A9                           |
| EWSR1     | Ewing sarcoma breakpoint region 1                         | 0    | MRPL44    | Mitochondrial ribosomal protein L44                    | -1 | SAE1     | SUMO1 activating enzyme subunit 1                         |
| FAM120A   | Family with sequence similarity 120A                      | 7    | MRPL45    | Mitochondrial ribosomal protein L45                    | -1 | SERPBP1  | SERPINE1 mRNA binding protein 1                           |
| FAM120C   | Family with sequence similarity 120C                      | -1   | MRPL46    | Mitochondrial ribosomal protein L46                    | -1 | SERPINB3 | Serpin peptidase inhibitor, clade B, member 3             |
| FAM35A    | Family with sequence similarity 35, member A              | -1   | MRPL48    | Mitochondrial ribosomal protein L48                    | 1  | SERPINB5 | Serpin peptidase inhibitor, clade B, member 5             |
| FAM98B    | Family with sequence similarity 98, member B              | 2    | MRPS15    | Mitochondrial ribosomal protein S15                    | 0  | SF3B2    | Splicing factor 3b, subunit 2                             |
| FLG       | Filaggrin                                                 | -5   | MRPS18B   | Mitochondrial ribosomal protein S18B                   | -1 | SFN      | 14-3-3 protein sigma                                      |
| FLG2      | Filaggrin family member 2                                 | 2    | MRPS2     | Mitochondrial ribosomal protein S2                     | 0  | SFPQ     | Splicing factor proline/ glutamine-rich                   |
| FLNA      | Filamin A, alpha                                          | -3   | MRPS22    | Mitochondrial ribosomal protein S22                    | -7 | SKIV2L2  | superkiller viralidic activity 2-like 2                   |
| FUS       | Fused in sarcoma                                          | -3   | MRPS23    | Mitochondrial ribosomal protein S23                    | -1 | SLC25A10 | 39S ribosomal protein L12, mitochondrial carrier          |
| G3BP1     | GTPase activating protein binding protein 1               | -1   | MRPS27    | mitochondrial ribosomal protein S27                    | -4 | SDN1     | Staphylococcal nuclease/tudor domain containing 1         |
| G3BP2     | GTPase activating protein binding prot 2                  | 1    | MRPS28    | Mitochondrial ribosomal protein S28                    | 0  | SPRR2D   | Small proline-rich protein 2D                             |
| GADD45G   | Growth arrest/DNA-damage-inducible, ̳ interar prot 1      | 1    | MRP30     | Mitochondrial ribosomal protein S30                    | 0  | SRSF1    | Serine/arginine-rich splicing factor 1                    |
| GAPDH     | Glyceraldehyde-3-phosphate dehydrogenase                  | 0    | MRP531    | Mitochondrial ribosomal protein S31                    | -2 | SRSF10   | Serine/arginine-rich splicing factor 10                   |
| GDE1      | Glycerophosphodiester phosphodiesterase 1                 | -1   | MRP535    | Mitochondrial ribosomal protein S35                    | -1 | SRSF3    | Serine/arginine-rich splicing factor 3                    |
| GM2A      | GM2 ganglioside activator                                 | 0    | MRPS5     | Mitochondrial ribosomal protein S5                     | -2 | SRSF6    | Serine/arginine-rich splicing factor 6                    |
| GNB2L1    | G prot, beta polypeptide 2-like 1                         | 5    | MRP57     | Mitochondrial ribosomal protein S7                     | -1 | SRSF9    | Serine/arginine-rich splicing factor 9                    |
| GSN       | Gelsolin                                                  | 3    | MRPS9     | Mitochondrial ribosomal protein S9                     | -1 | STAU1    | Staufen, RNA binding protein, homolog 1                   |
| GSTP1     | Glutathione S-transferase pi 1                            | -5   | MX1       | myxovirus resist 1, interferon-inducible protein p78   | -4 | SYNCRIP  | Heterogeneous nuclear ribonucleoprotein Q                 |
| GTF2I     | General transcription factor II-I                         | 4    | MYH9      | Myosin, heavy chain 9, non-muscle                      | 5  | TAGLN2   | Transgelin 2                                              |
| H1FX      | H1 histone family, member X                               | -1   | MYL12A    | Myosin, light chain 12A, regulatory, non-sarcomeric    | -2 | TARDBP   | TAR DNA-binding prot                                      |
| H3F3A     | H3 histone, family 3A                                     | 0    | NAMPT     | Pre-B-cell colony enhancing factor 1                   | -1 | TF       | Transferrin                                               |
| HAL       | Histidine ammonia-lyase                                   | -2   | NCCRP1    | Non-specific cytotoxic cell receptor prot 1 homolog    | -2 | TFAM     | Transcription factor A, mitochondrial                     |
| HIST1H1E  | Histone cluster 1, H1e                                    | -2   | NCL       | Nucleolin                                              | 2  | TGM1     | Transglutaminase 1                                        |
| HIST1H2A  | Histone cluster 1, H2ab                                   | -1   | NGRN      | Neugrin, neurite outgrowth associated                  | 2  | TGM3     | Transglutaminase 3                                        |
| HNRNPA0   | Heterogeneous nuclear ribonucleoprotein A0                | 0    | NONO      | Non-POU domain containing, octamer-binding             | -4 | THOC4    | THO complex 4                                             |
| HNRNPA2   | Heterogeneous nuclear ribonucleoprotein A2/B1             | 2    | UNUS5     | NOP2/Sun domain family, member 5                       | 2  | TP11     | Triosephosphate isomerase 1                               |
| HNRNPA3   | Heterogeneous nuclear ribonucleoprotein A3                | -1   | NXF1      | Nuclear RNA export factor 1                            | 2  | TRIM29   | Tripartite motif containing 29                            |
| HNRNPA8   | Heterogeneous nuclear ribonucleoprotein A/B               | -2   | PAHB      | Prolyl 4-hydroxylase, beta polypeptide                 | -7 | TRUB2    | TruB pseudouridine (psi) synthase homolog 2               |
| HNRNPC    | Heterogeneous nuclear ribonucleoprotein C (C1/C2)         | 5    | PABCP1    | Poly(A) binding protein, cytoplasmic 1                 | -2 | TUBA1B   | Tubulin, alpha 1b                                         |
| HNRNPD    | Heterogeneous nuclear ribonucleoprotein D                 | 1    | PCBP2     | Poly(rC) binding protein 2                             | -4 | TUBA4A   | Tubulin, alpha 4a                                         |
| HNRNPF    | Heterogeneous nuclear ribonucleoprotein F                 | -1   | PFN1      | Profilin 1                                             | -1 | TUBB     | Tubulin, beta                                             |
| HNRNPH1   | Heterogeneous nuclear ribonucleoprotein H1 (H)            | 0    | PGK1      | Phosphoglycerate kinase 1                              | -5 | TUBB2C   | Tubulin, beta 2C                                          |
| HNRNPH2   | Heterogeneous nuclear ribonucleoprotein H2 (H')           | 0    | PHB2      | Prohibitin 2                                           | 2  | TUBB4    | Tubulin, beta 4                                           |
| HNRNPH3   | Heterogeneous nuclear ribonucleoprotein H3                | 0    | PICALM    | Phosphatidylinositol binding clathrin assembly protein | -4 | TYMP     | Thymidine phosphorylase                                   |
| HNRNPK    | Heterogeneous nuclear ribonucleoprotein K                 | 1    | PKM2      | Pyruvate kinase, muscle                                | -3 | UBA2     | Ubiquitin-like modifier activating enzyme 2               |
| HNRNPL    | Heterogeneous nuclear ribonucleoprotein L                 | 7    | PKP1      | Plakophilin 1                                          | 1  | UPF1     | UPF1 regulator of nonsense transcripts homolog            |
| HNRNPM    | Heterogeneous nuclear ribonucleoprotein M                 | 5    | PLOD1     | Procollagen-lysine 1, 2-oxoglutarate 5-dioxygenase 1   | 2  | VCP      | Valosin containing protein                                |
| HNRNPR    | Heterogeneous nuclear ribonucleoprotein R                 | 3    | PLOD1     | procollagen-lysine 1, 2-oxoglutarate 5-dioxygenase 1   | -1 | WSCR22   | Williams Beuren syndrome chromosome region 22             |
| HNRNPU    | Heterogeneous nuclear ribonucleoprotein U                 | -3   | PN01      | Partner of NOB1 homolog                                | -2 | WDR6     | WD repeat domain 6                                        |
| HNRNPUL   | Heterogeneous nuclear ribonucleoprotein U-like 1          | -1   | PNP       | Purine nucleoside phosphorylase                        | -1 | WIBG     | Within bgcn homolog                                       |
| HNRNPUL   | Heterogeneous nuclear ribonucleoprotein U-like 2          | 3    | POF1B     | Premature ovarian failure, 1B                          | -1 | XRCC5    | X-ray repair complex defective in Chinese hamster cells 5 |
| HNRNPD    | Heterogeneous nuclear ribonucleoprotein D-like            | 1    | POLDIP3   | DNA polymerase, delta interacting prot 3               | 1  | XRCC6    | X-ray repair complex defective in Chinese hamster cells 6 |
| HNRNPD    | Heterogeneous nuclear ribonucleoprotein D-like            | 1    | PIPIA     | Peptidylprolyl isomerase A                             | -2 | XRND2    | 5'-3' exoribonuclease 2                                   |
| HNRNPD    | Heterogeneous nuclear ribonucleoprotein D-like            | 1    | PPL       | Periplakin                                             | -2 | YBX1     | Y box binding protein 1                                   |
| HSP90AB1  | Heat shock protein 90kDa alpha, class B member 1          | -6   | PPP2R1A   | Prot phosphatase 2, regulatory subunit A, alpha        | -1 | YTHDC2   | YTH domain containing 2                                   |
| HSPA1A    | Heat shock 70kDa protein 1A                               | -3   | PRDX1     | Peroxiredoxin 1                                        | 3  | YWHAE    | 14-3-3 epsilon                                            |
| HSPA5     | Heat shock 70kDa protein 5                                | -3   | PRMT1     | Protein arginine methyltransferase 1                   | -1 | YWHAQ    | Tyr 3-/Trp 5-monoxygenase activation prot, theta          |
| HSPB1     | Heat shock 70kDa protein 8 isoform 1                      | -3   | PRPF19    | PRP19/PSO4 pre-mRNA processing factor 19 homolog       | 1  | YWHAZ    | Tyr 3-/Trp 5-monoxygenase activation prot, zeta polypep   |
| HSPD1     | Heat shock 60kDa protein 1                                | -5   | PRPF31    | PRP31 pre-mRNA processing factor 31 homolog            | 0  | ZC3H4V1  | Zinc finger CCHC-type, antiviral 1                        |
| ICT1      | Immature colon carcinoma transcript 1                     | 1    | PRSS3     | Protease, serine, 3                                    | 0  | ZNF326   | Zinc finger protein 326                                   |
|           |                                                           | 0    | PTBP1     | Polypyrimidine tract binding protein 1                 | 0  |          |                                                           |

Figure S1

A

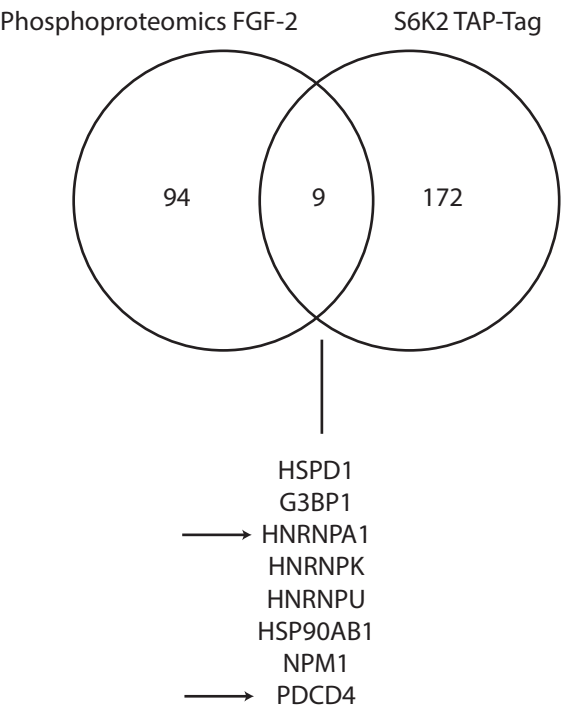

B

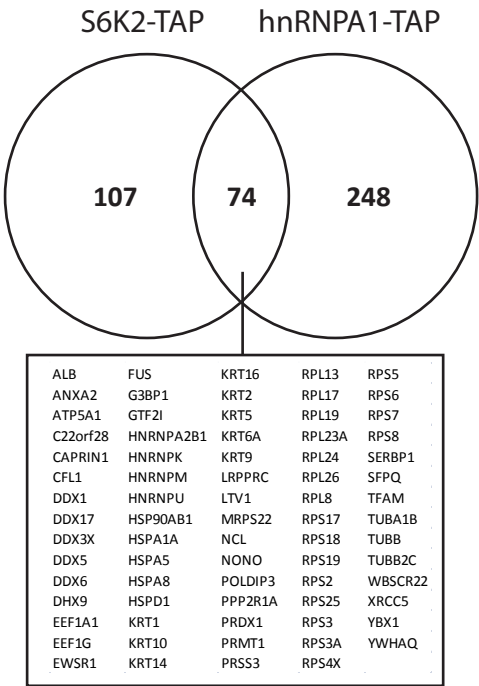

C

| GO annotation                                                                        | Q-value  | Genes in network | Genes in genome |
|--------------------------------------------------------------------------------------|----------|------------------|-----------------|
| <b>Translation-related</b>                                                           |          |                  |                 |
| Translational elongation                                                             | 2.30E-69 | 41               | 97              |
| Ribosome                                                                             | 9.23E-59 | 40               | 150             |
| Cytosolic ribosome                                                                   | 4.11E-67 | 39               | 88              |
| Translational termination                                                            | 4.11E-67 | 39               | 88              |
| Structural constituent of ribosome                                                   | 3.78E-43 | 29               | 97              |
| Small ribosomal subunit                                                              | 4.37E-33 | 21               | 55              |
| Cytosolic small ribosomal subunit                                                    | 5.26E-36 | 20               | 35              |
| Cytosolic large ribosomal subunit                                                    | 1.85E-29 | 19               | 51              |
| Large ribosomal subunit                                                              | 4.29E-27 | 19               | 65              |
| Ribonucleoprotein complex biogenesis                                                 | 3.11E-11 | 13               | 135             |
| Cellular component biogenesis at cellular level                                      | 5.82E-11 | 13               | 142             |
| Ribosome biogenesis                                                                  | 7.22E-14 | 12               | 63              |
| Ribosomal small subunit biogenesis                                                   | 4.15E-10 | 7                | 17              |
| Regulation of translation                                                            | 3.69E-03 | 6                | 106             |
| Translational initiation                                                             | 4.99E-03 | 5                | 66              |
| Ribosomal large subunit biogenesis                                                   | 6.36E-05 | 4                | 11              |
| Cytoplasmic stress granule                                                           | 5.37E-04 | 4                | 18              |
| ATP-dependent RNA helicase activity                                                  | 2.99E-02 | 3                | 20              |
| <b>RNA processing</b>                                                                |          |                  |                 |
| ncRNA processing                                                                     | 2.20E-11 | 12               | 100             |
| ncRNA metabolic process                                                              | 1.86E-08 | 12               | 177             |
| RNA splicing                                                                         | 9.13E-07 | 12               | 250             |
| rRNA processing                                                                      | 3.20E-13 | 11               | 51              |
| rRNA metabolic process                                                               | 9.45E-13 | 11               | 56              |
| Posttranscriptional regulation of gene expression                                    | 1.79E-06 | 11               | 210             |
| RNA splicing, via transesterification reactions with bulged adenosine as nucleophile | 1.13E-05 | 10               | 196             |
| Nuclear mRNA splicing, via spliceosome                                               | 1.13E-05 | 10               | 196             |
| RNA splicing, via transesterification reactions                                      | 1.46E-05 | 10               | 202             |
| mRNA processing                                                                      | 1.22E-04 | 10               | 256             |
| RNA helicase activity                                                                | 2.27E-08 | 7                | 28              |
| Spliceosomal complex                                                                 | 4.25E-03 | 6                | 109             |
| mRNA binding                                                                         | 5.98E-03 | 5                | 69              |
| Catalytic step 2 spliceosome                                                         | 1.19E-02 | 5                | 80              |
| Nuclear body                                                                         | 7.21E-02 | 5                | 123             |
| RNA-dependent ATPase activity                                                        | 1.02E-03 | 4                | 21              |
| Regulation of mRNA stability                                                         | 1.71E-03 | 4                | 24              |
| Regulation of RNA stability                                                          | 1.99E-03 | 4                | 25              |
| Ribonucleoprotein granule                                                            | 2.28E-02 | 4                | 49              |
| Alternative nuclear mRNA splicing, via spliceosome                                   | 1.88E-02 | 3                | 17              |
| RNA stabilization                                                                    | 1.88E-02 | 3                | 17              |
| Heterogeneous nuclear ribonucleoprotein complex                                      | 1.88E-02 | 3                | 17              |
| mRNA stabilization                                                                   | 1.88E-02 | 3                | 17              |
| <b>Protein complex</b>                                                               |          |                  |                 |
| Cellular protein complex disassembly                                                 | 3.91E-61 | 39               | 118             |
| Protein complex disassembly                                                          | 1.32E-60 | 39               | 122             |
| Cellular macromolecular complex disassembly                                          | 2.63E-58 | 39               | 138             |
| Macromolecular complex disassembly                                                   | 8.69E-58 | 39               | 142             |
| Cellular component disassembly at cellular level                                     | 3.28E-50 | 39               | 214             |
| Cellular component disassembly                                                       | 5.59E-50 | 39               | 217             |
| Signalosome                                                                          | 8.78E-02 | 3                | 29              |
| <b>Others</b>                                                                        |          |                  |                 |
| Cytosolic part                                                                       | 7.35E-61 | 40               | 134             |
| Viral infectious cycle                                                               | 5.37E-52 | 40               | 215             |
| Viral reproductive process                                                           | 2.86E-50 | 40               | 236             |
| Endocrine pancreas development                                                       | 3.28E-61 | 39               | 117             |
| Pancreas development                                                                 | 1.69E-60 | 39               | 123             |
| Endocrine system development                                                         | 1.75E-57 | 39               | 145             |
| Viral transcription                                                                  | 1.75E-57 | 39               | 145             |
| Viral genome expression                                                              | 1.75E-57 | 39               | 145             |
| ATPase activity                                                                      | 1.06E-04 | 9                | 191             |
| Intermediate filament                                                                | 3.99E-07 | 7                | 41              |
| Structural constituent of cytoskeleton                                               | 9.03E-06 | 7                | 64              |
| Intermediate filament cytoskeleton                                                   | 1.88E-05 | 7                | 72              |
| Epidermis development                                                                | 1.34E-03 | 7                | 137             |
| Helicase activity                                                                    | 7.40E-06 | 7                | 62              |
| ATPase activity, coupled                                                             | 1.82E-02 | 6                | 145             |
| Protein folding                                                                      | 4.59E-02 | 5                | 111             |
| Response to unfolded protein                                                         | 1.30E-02 | 4                | 41              |
| Purine NTP-dependent helicase activity                                               | 1.38E-02 | 4                | 42              |
| ATP-dependent helicase activity                                                      | 1.38E-02 | 4                | 42              |
| Response to topologically incorrect protein                                          | 1.88E-02 | 4                | 46              |
| Cytoskeleton-dependent intracellular transport                                       | 9.59E-02 | 3                | 30              |
| MHC class I protein binding                                                          | 5.71E-03 | 3                | 11              |
| Telomeric DNA binding                                                                | 1.19E-02 | 3                | 14              |
| MHC protein binding                                                                  | 2.58E-02 | 3                | 19              |
| Chaperone binding                                                                    | 7.21E-02 | 3                | 27              |

**Figure S2**

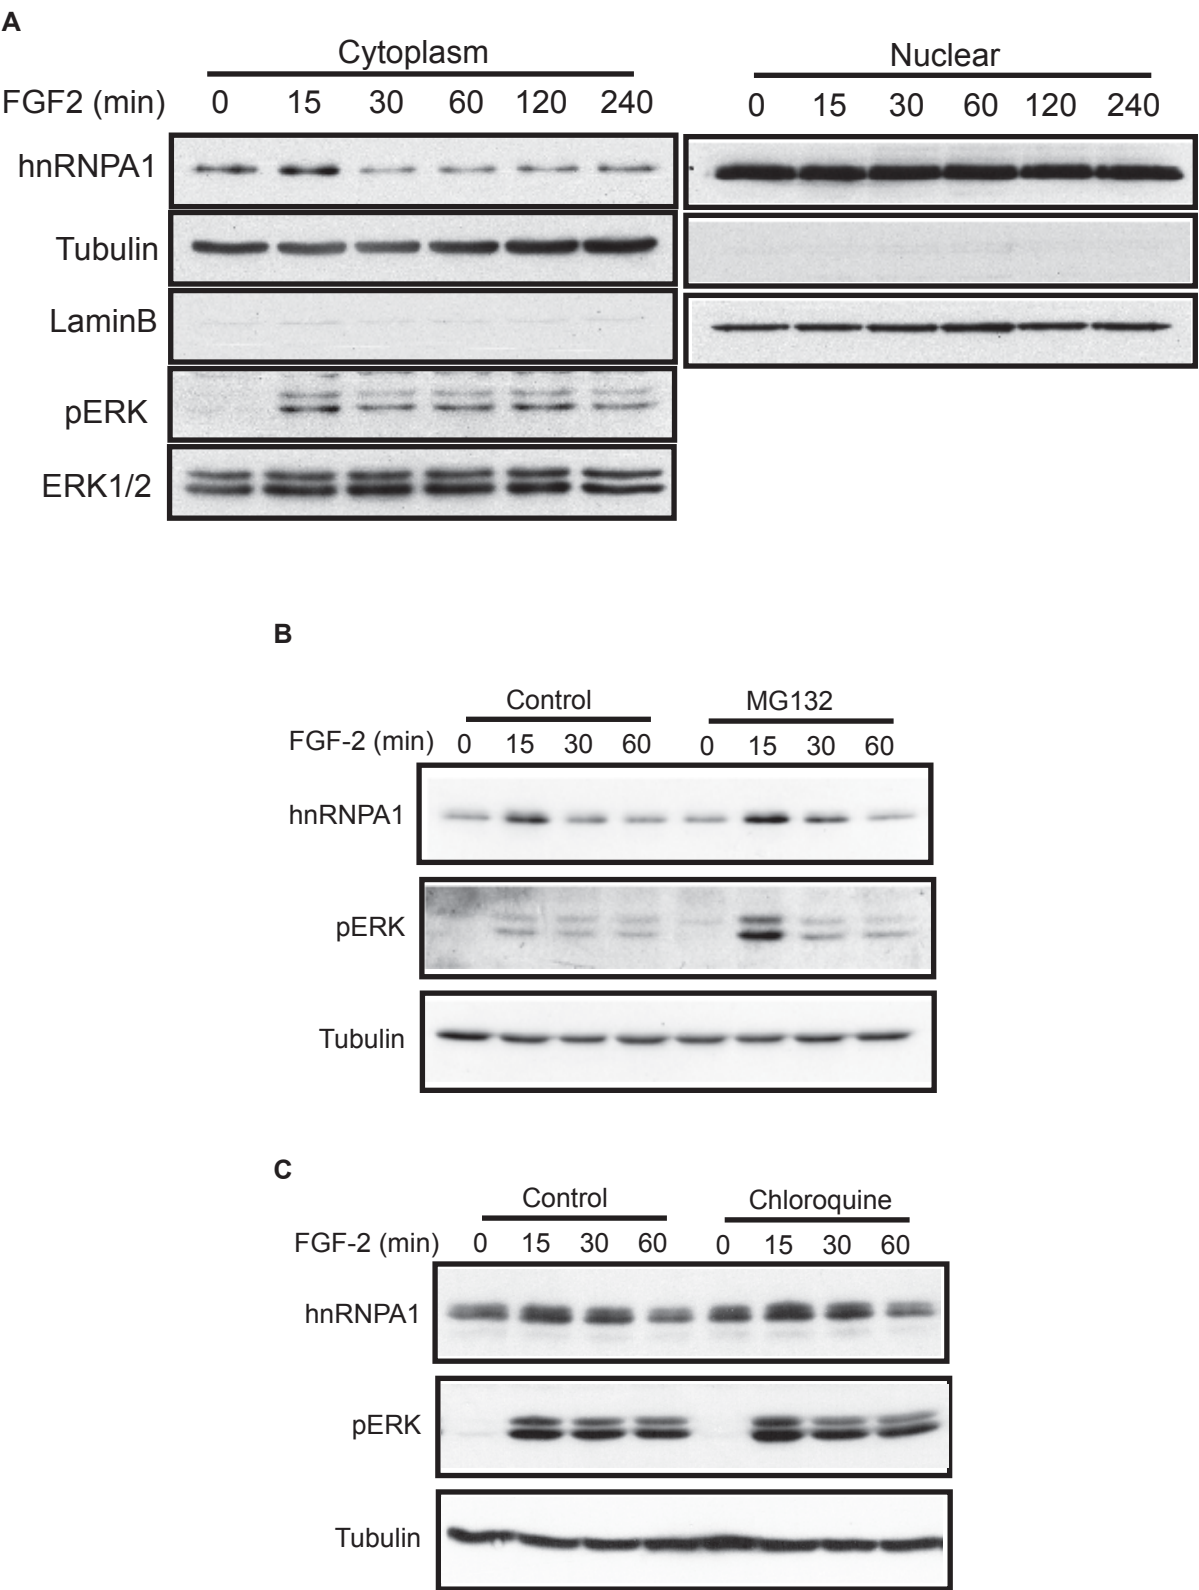

Figure S3

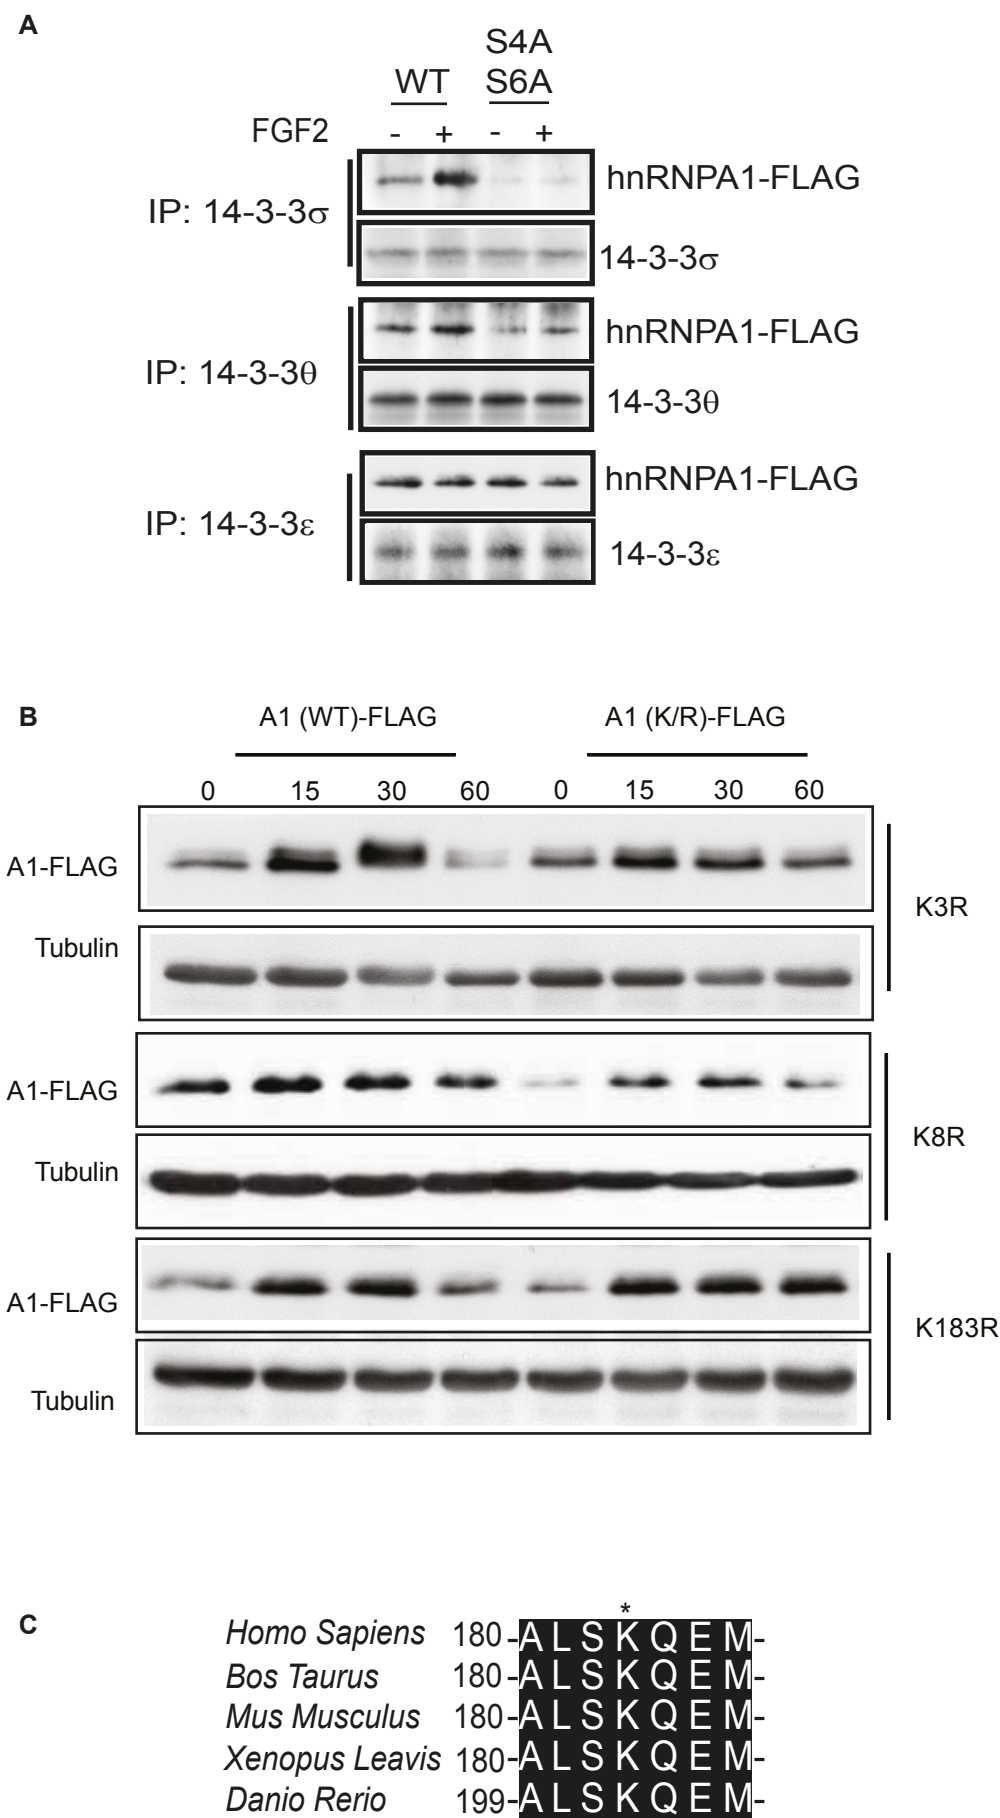

Figure S4

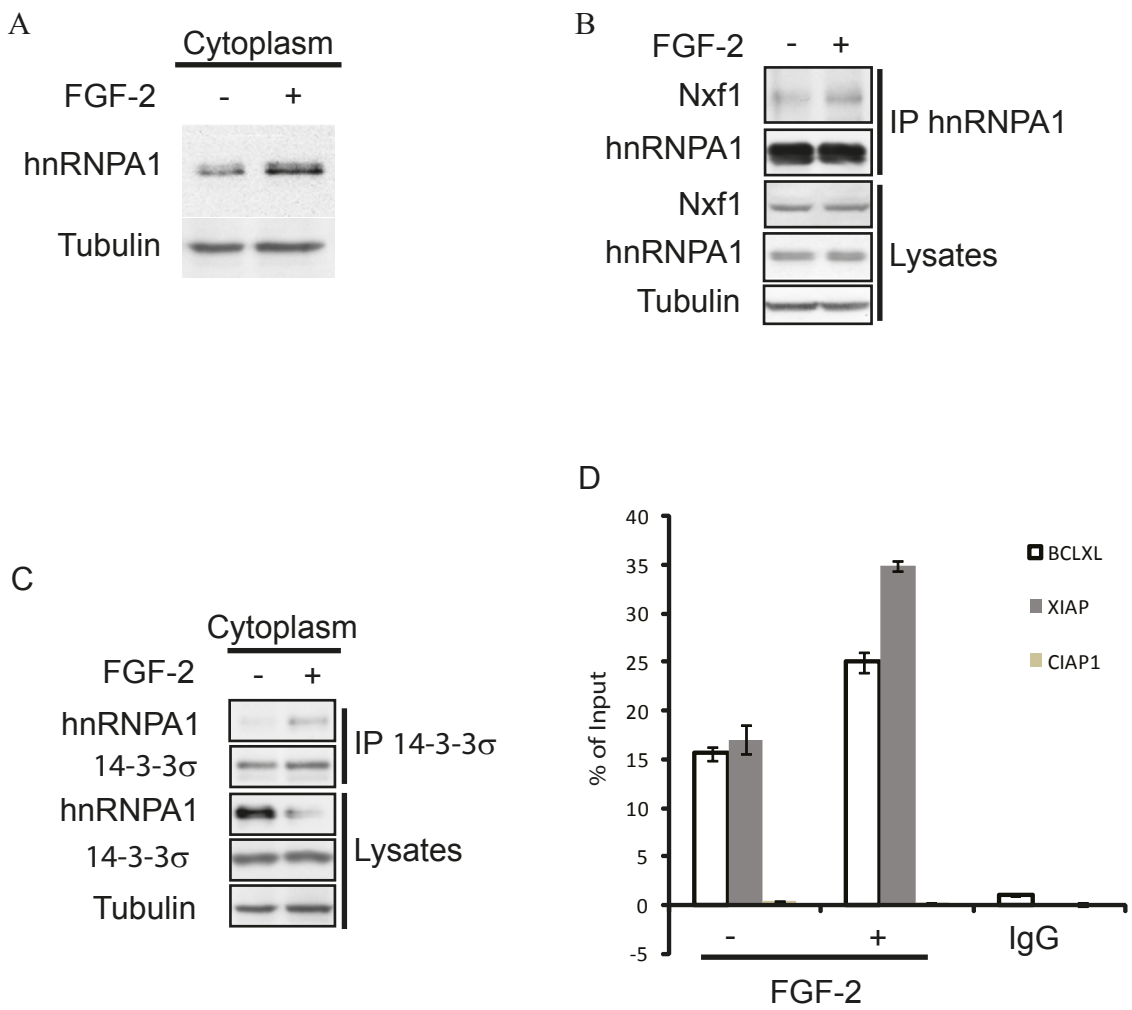



Figure S5

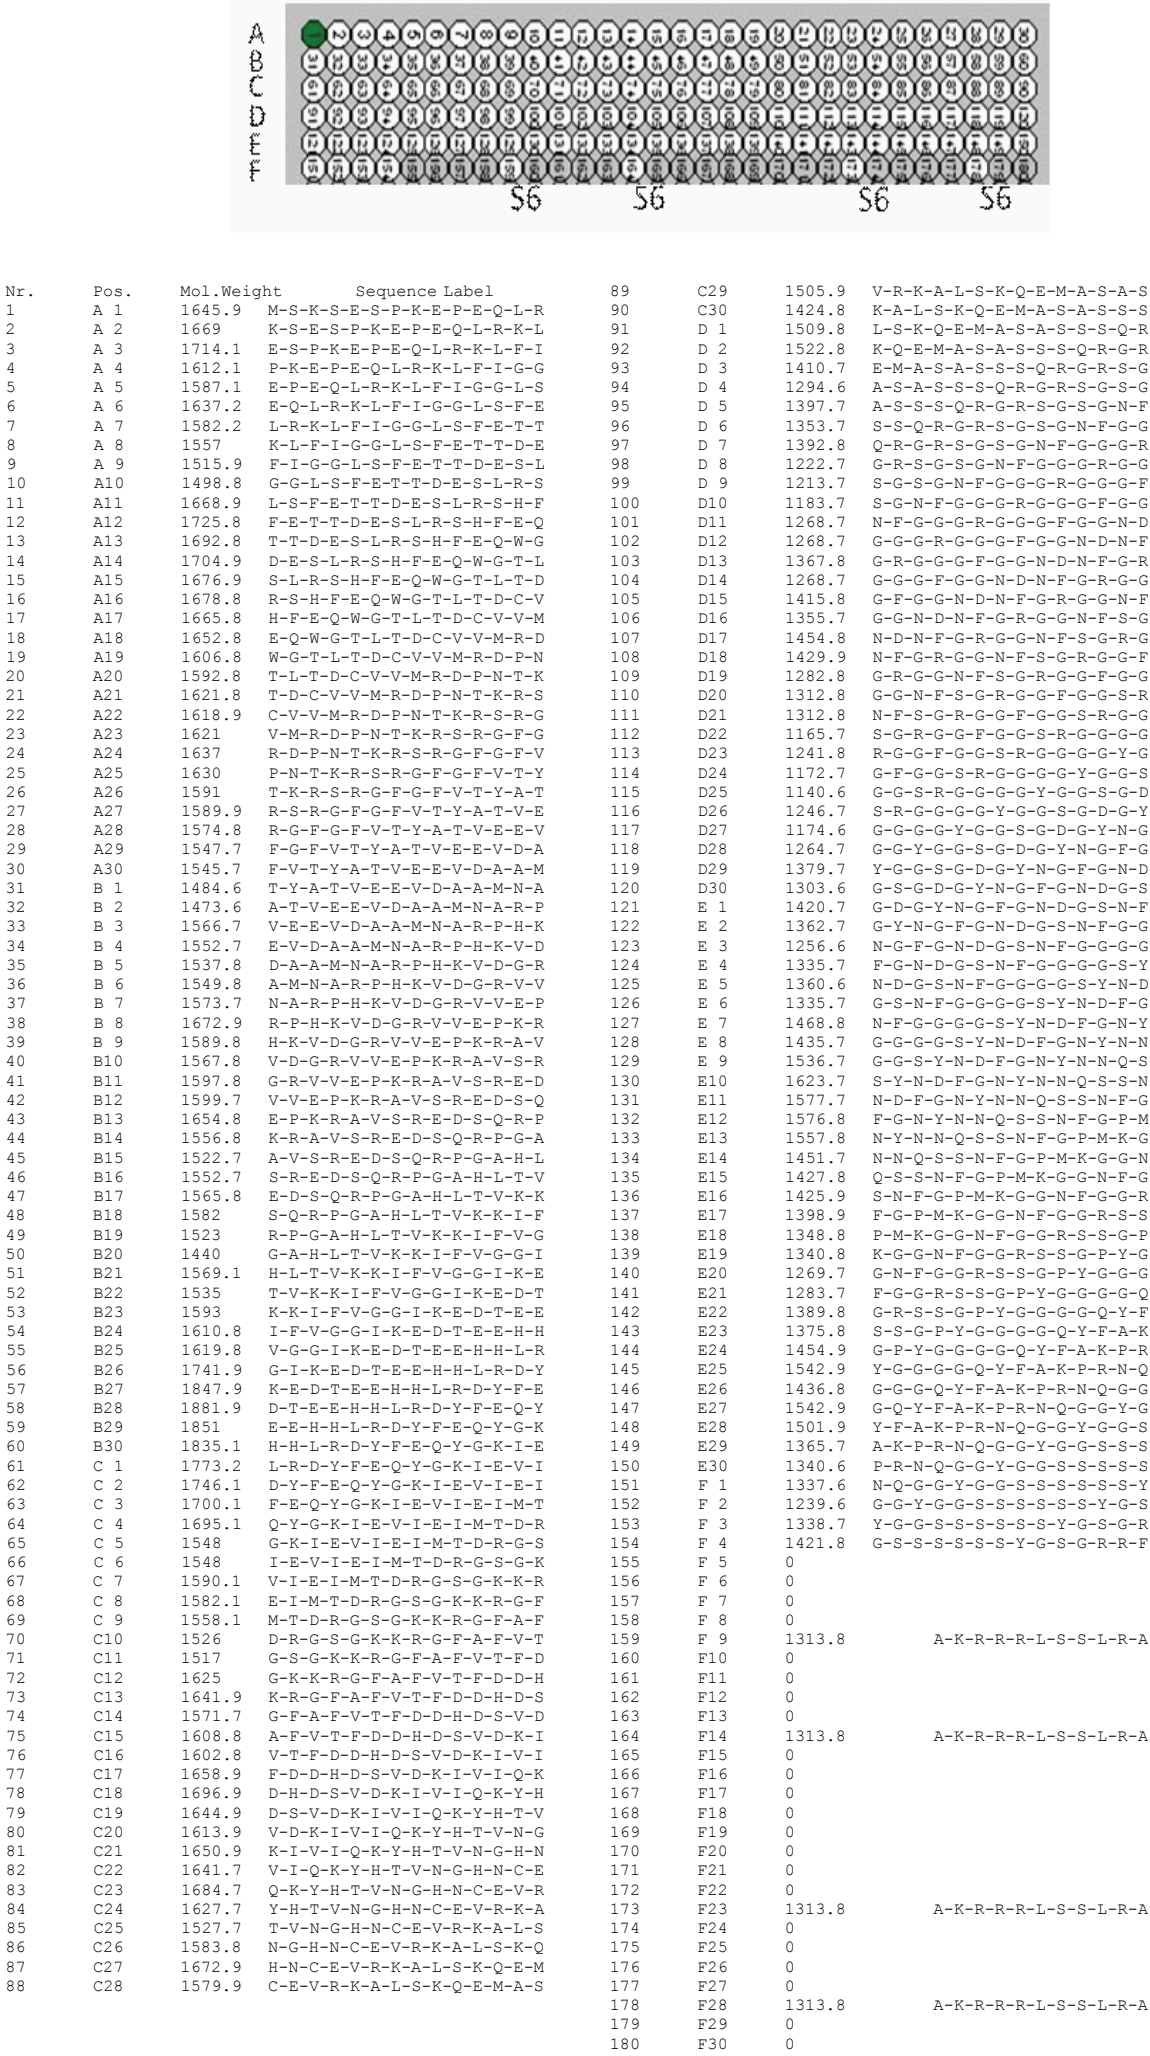

Figure S6

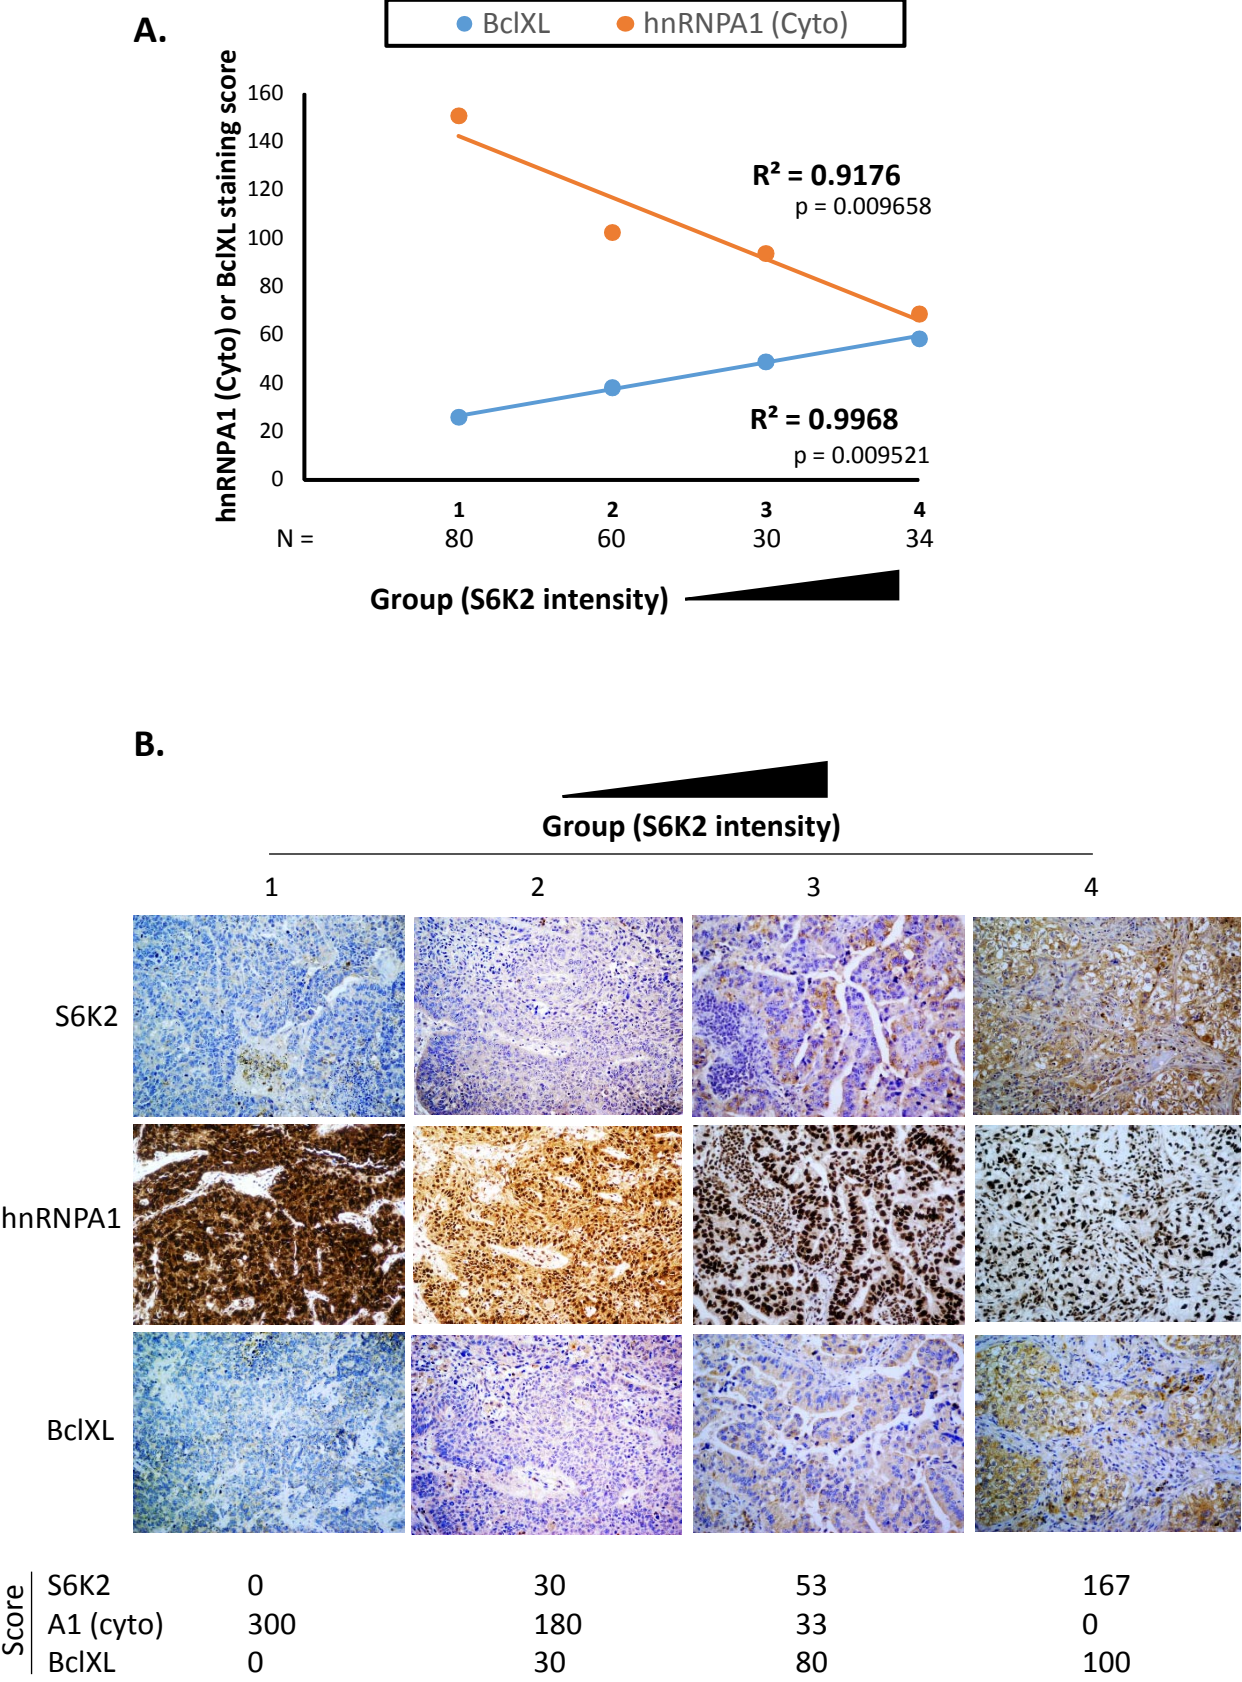



**Figure S7**

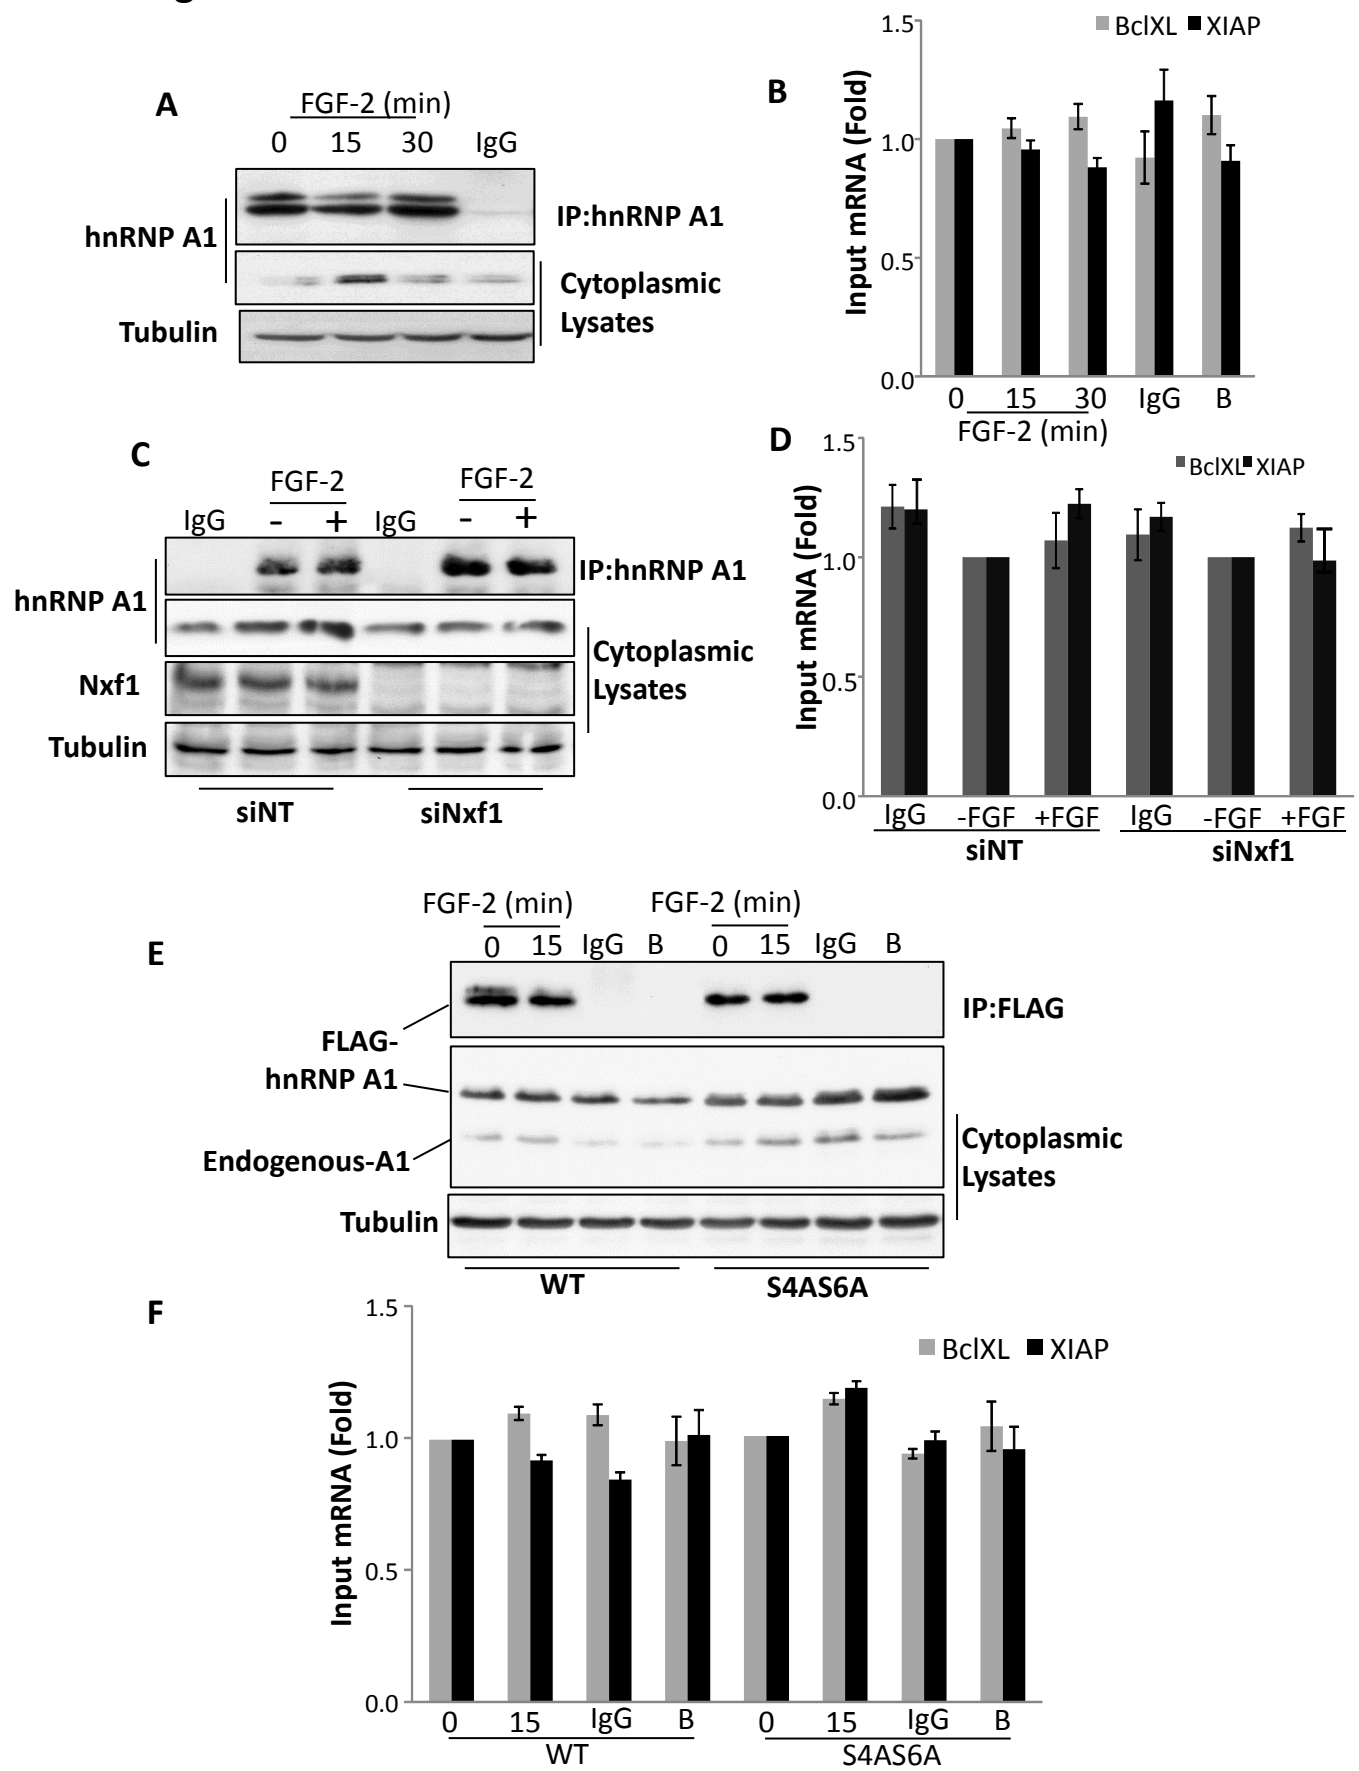

Supplement: gku953_Supplementary_Data.zip [file gku953_Supplementary_Data.zip]
